# Supplementary material for: Near IR-emitting DNA-probes exploiting stepwise energy transfer processes
Source: Royal Society of Chemistry journal article supplement (doi:10.1039/b708940f), 2007-01-01
Supplement: b708940f.pdf [file b708940f.pdf]

## Near IR-emitting DNA-probes exploiting stepwise energy transfer processes

Andras Bodi, K. Eszter Borbas and James I. Bruce

**Absorption and excitation spectra of 1 in CH<sub>2</sub>Cl<sub>2</sub>**

**S-I**

**Emission spectra of 1 in CH<sub>2</sub>Cl<sub>2</sub>**

**S-II**

**Emission spectra of Yb1 with and without DNA**

**S-II**

**B3LYP/6-31G(d,p) optimized geometries**

**S-III-XXXIX**

**Reference**

**S-XXXIX**

**General Procedures.** Absorption spectra and fluorescence spectra were collected at room temperature in methanol, unless noted otherwise. Emission spectra were recorded on a FluoromaxP or a Fluorolog 3 Tau spectrofluorimeter. Titrations of **1** with double stranded salmon testis DNA were carried out in HPLC-grade methanol in triplicates. Concentrations were such that  $A(\mathbf{1}) < 0.1$ . Aliquots of a stock solution of *ds*DNA (in 10 mM HEPES) were added to the methanolic solution of **1**. Excitation of the sample was performed at 328 nm and 525 nm. The emission intensity was monitored between 540 and 750 nm. Emission intensities and luminescent lifetimes of the Nd and Yb complexes were determined in methanol analogously to a reported method in HPLC-grade methanol.<sup>12</sup>

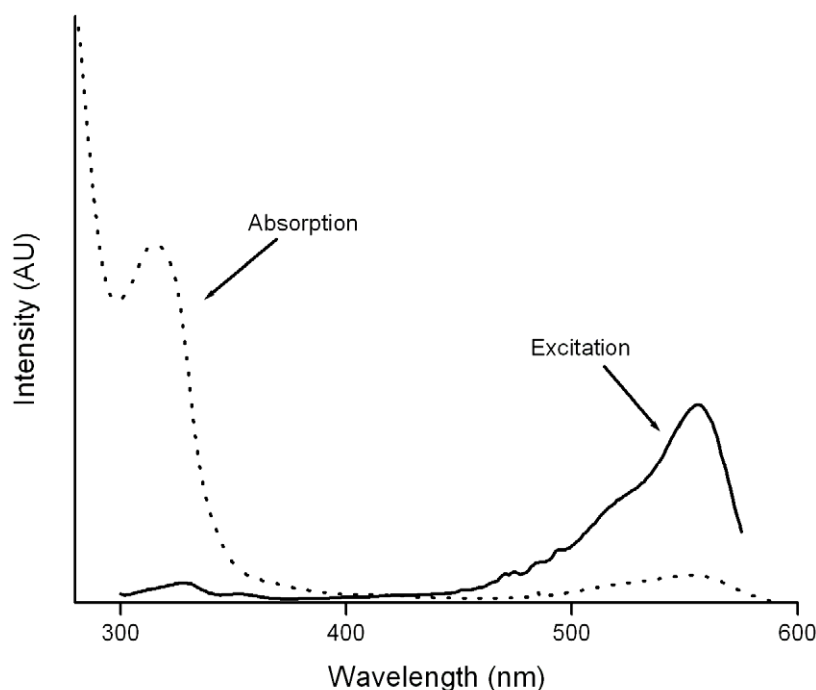

**Figure 1.** Absorption and excitation spectra of **1** in CH<sub>2</sub>Cl<sub>2</sub>.

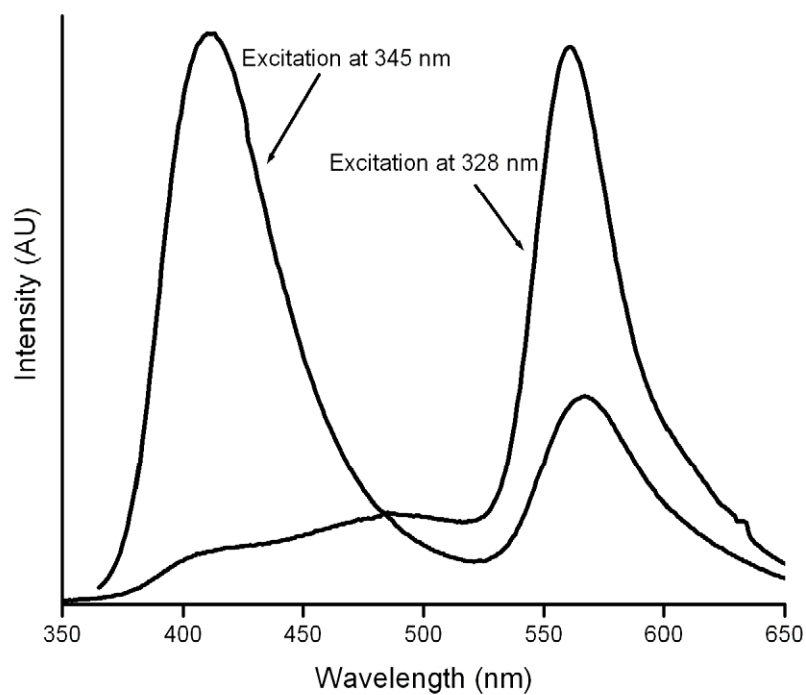

**Fig. 2** Emission spectra of **1** in CH<sub>2</sub>Cl<sub>2</sub>. Excitations were performed at 345 nm and 328 nm.

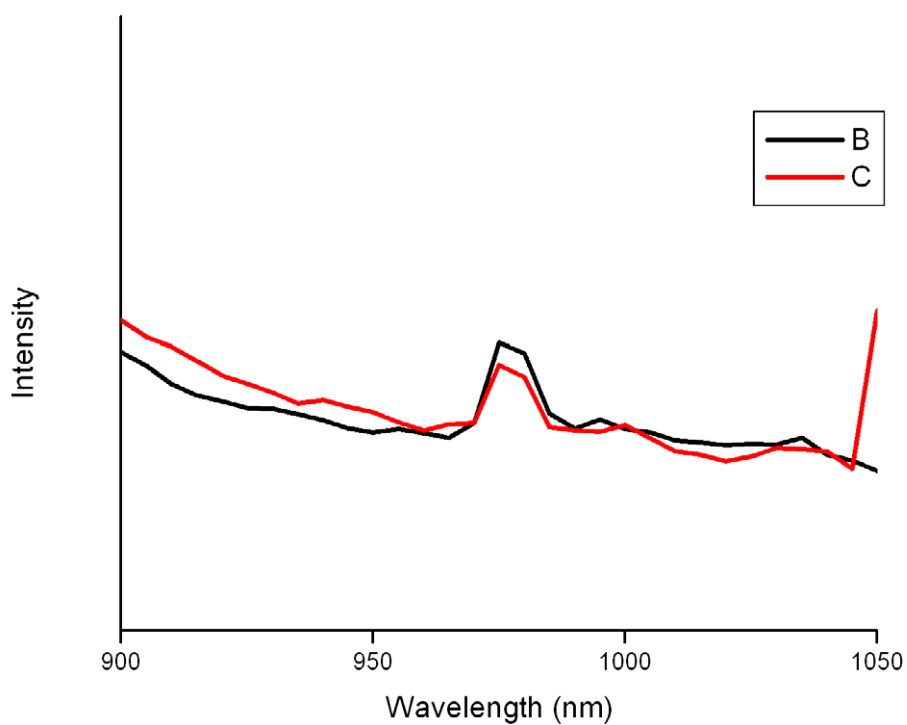

**Figure 3.** Emission spectra of **Yb1** without (Data set 'B') and with added DNA (1 equiv., Data set 'C'). [Yb1] = 0.033 mM,  $\lambda_{\text{exc}}$  = 355 nm.

B3LYP/6-31G(d,p) optimized geometries in Cartesian coordinates (Å) for selected conformers of **4** that have been subjected to frequency analysis and B3LYP/6-311+G(d,p) single point energy calculations with the Gaussian 03 computational chemistry suite.<sup>1</sup> In the graphics hydrogen atoms bound to N's are only shown for clarity.

For the notation see Table 1 in text.

4.[2424].1.iei

|   |             |             |             |
|---|-------------|-------------|-------------|
| C | 2.81762000  | 1.70344400  | -1.63234800 |
| N | 2.67788100  | 1.83941300  | -0.18488500 |
| C | 3.76384300  | 2.57303800  | 0.46781800  |
| C | 6.03094200  | -0.41325500 | 0.04457100  |
| N | 5.08526600  | 0.50220700  | 0.66654600  |
| C | 5.16067000  | 1.91816000  | 0.33795700  |
| C | 1.74907000  | 0.74501400  | -2.18209500 |
| N | 1.72454000  | -0.57090600 | -1.54627900 |
| C | 2.45409400  | -1.65022600 | -2.21123700 |
| C | 5.48526600  | -1.86117600 | 0.05698700  |
| N | 4.14271700  | -2.05701200 | -0.47158900 |
| C | 3.95056800  | -1.71114200 | -1.87111500 |
| H | 5.50703700  | 1.99806000  | -0.69841100 |
| H | 5.88601200  | 2.49108600  | 0.94432200  |
| H | 3.50670400  | 2.65525400  | 1.53214200  |
| H | 3.80638100  | 3.59829800  | 0.07693100  |
| H | 2.34845800  | -1.56410600 | -3.30651400 |
| H | 2.00777300  | -2.60409100 | -1.91141800 |
| H | 4.41288800  | -2.48375100 | -2.50488900 |
| H | 4.41390700  | -0.75436100 | -2.17118900 |
| H | 1.90606800  | 0.63235100  | -3.26681000 |
| H | 0.76757600  | 1.21625900  | -2.04780500 |
| H | 3.81045900  | 1.34009400  | -1.94277700 |
| H | 2.68126500  | 2.68675200  | -2.10530900 |
| H | 5.48357100  | -2.22686000 | 1.09282900  |
| H | 6.19272000  | -2.49956500 | -0.49125800 |
| H | 6.17157100  | -0.08301800 | -0.99114100 |
| H | 7.03754400  | -0.40898400 | 0.50438300  |
| C | 0.54418700  | -0.89513300 | -0.77788000 |
| H | 0.28701600  | -1.95488500 | -0.90980500 |
| H | -0.32361500 | -0.32469900 | -1.12740900 |
| C | 0.72489100  | -0.70157800 | 0.74451200  |
| O | 1.80096700  | -0.92702400 | 1.29563500  |
| N | -0.36898800 | -0.30583800 | 1.47822200  |
| C | -0.21466900 | -0.18731500 | 2.94280300  |
| H | 0.79606300  | 0.17935400  | 3.13336400  |
| H | -0.92822100 | 0.56719100  | 3.28601600  |
| C | -0.44146400 | -1.51169200 | 3.67211100  |
| H | -1.45046000 | -1.89726900 | 3.49540800  |
| H | 0.28495400  | -2.25643400 | 3.33760000  |
| H | -0.31712600 | -1.37300800 | 4.75126800  |
| C | -2.57466400 | -0.94297400 | 0.65282100  |
| C | -3.82094700 | -0.60488500 | 0.12518400  |
| C | -1.63520700 | 0.05284700  | 0.90961200  |
| C | -4.15015100 | 0.73420100  | -0.14941000 |
| C | -1.92815800 | 1.41549300  | 0.65271000  |
| C | -5.96630200 | -1.41370400 | -0.62942100 |
| C | -5.46873800 | 1.01275300  | -0.70112100 |
| C | -3.18121000 | 1.71782200  | 0.12574400  |
| C | -6.31101100 | -0.02837700 | -0.91841400 |
| H | -3.41616800 | 2.75657600  | -0.08302400 |
| H | -7.30449300 | 0.11800000  | -1.32665900 |
| H | -2.34815900 | -1.98373700 | 0.85387300  |
| C | -0.92038200 | 2.50383800  | 0.93487500  |
| H | 0.06778800  | 2.28510800  | 0.51327100  |
| H | -1.26447600 | 3.45807500  | 0.52728500  |
| H | -0.77642000 | 2.64236000  | 2.01319100  |
| C | -5.87499700 | 2.42573300  | -1.01835800 |
| H | -5.19706600 | 2.87419000  | -1.75330400 |
| H | -6.88845000 | 2.45969600  | -1.42258100 |
| H | -5.84144700 | 3.05600600  | -0.12255000 |
| O | -4.69039800 | -1.62968300 | -0.10496500 |
| O | -6.67602900 | -2.37579900 | -0.80186100 |
| H | 5.02290100  | 0.35035300  | 1.66847800  |
| H | 3.48224300  | -1.52375600 | 0.09330500  |
| H | 2.70947300  | 0.89313400  | 0.19677300  |

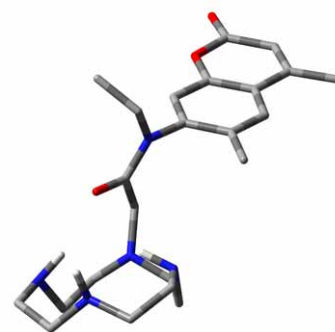

[4.[2424].1.1ei.N4-CH<sub>3</sub>]<sup>+</sup>

|   |             |             |             |
|---|-------------|-------------|-------------|
| C | 2.72081700  | 2.10745400  | -1.70335300 |
| N | 2.53059600  | 2.22819000  | -0.26218800 |
| C | 3.62451800  | 2.88455000  | 0.45439700  |
| C | 5.73371600  | -0.25046900 | 0.30703900  |
| N | 4.73148100  | 0.70285100  | 0.74630300  |
| C | 4.96356900  | 2.11460800  | 0.41489000  |
| C | 1.64754800  | 1.18729800  | -2.29584000 |
| N | 1.61570900  | -0.15702600 | -1.69875100 |
| C | 2.38113700  | -1.19891600 | -2.35418300 |
| C | 5.17169000  | -1.67441600 | 0.31986200  |
| N | 3.82346900  | -1.82646900 | -0.35059700 |
| C | 3.80550200  | -1.40947000 | -1.79818800 |
| H | 5.38723600  | 2.14955200  | -0.59452800 |
| H | 5.69552600  | 2.60512900  | 1.07519300  |
| H | 3.31010100  | 3.00515500  | 1.49850800  |
| H | 3.77692500  | 3.89458400  | 0.05759500  |
| H | 2.51829900  | -0.96368900 | -3.42020900 |
| H | 1.82401100  | -2.14235600 | -2.32644700 |
| H | 4.34014200  | -2.17266800 | -2.37355700 |
| H | 4.35378900  | -0.47198800 | -1.86428000 |
| H | 1.79969100  | 1.10822600  | -3.38176200 |
| H | 0.67087200  | 1.65520100  | -2.13880800 |
| H | 3.71703600  | 1.72363300  | -1.99113200 |
| H | 2.62963600  | 3.09697300  | -2.16920200 |
| H | 5.02003800  | -2.00975600 | 1.34987800  |
| H | 5.86489000  | -2.37086100 | -0.16147100 |
| H | 6.05133400  | 0.02527800  | -0.70369000 |
| H | 6.65787000  | -0.27617200 | 0.91038200  |
| C | 0.42946300  | -0.52341900 | -0.95008700 |
| H | 0.09233800  | -1.53448300 | -1.22314300 |
| H | -0.39840000 | 0.14345100  | -1.19992900 |
| C | 0.64813900  | -0.53299200 | 0.57761400  |
| O | 1.76217900  | -0.83696600 | 1.05569600  |
| N | -0.39132300 | -0.22818100 | 1.38158500  |
| C | -0.20966400 | -0.28128900 | 2.85294500  |
| H | 0.81112300  | 0.04073900  | 3.06517600  |
| H | -0.89824700 | 0.45011900  | 3.28189900  |
| C | -0.47150700 | -1.67003400 | 3.43368200  |
| H | -1.49322500 | -2.00203600 | 3.22914400  |
| H | 0.22685300  | -2.40212200 | 3.01932000  |
| H | -0.33697800 | -1.64817000 | 4.51923800  |
| C | -2.57065100 | -0.92511600 | 0.53664800  |
| C | -3.85505500 | -0.62551200 | 0.08023500  |
| C | -1.70352000 | 0.10709400  | 0.88305600  |
| C | -4.28971700 | 0.70858700  | -0.02276600 |
| C | -2.09260100 | 1.46268100  | 0.79008600  |
| C | -5.95639500 | -1.50126300 | -0.72293000 |
| C | -5.64897700 | 0.95005500  | -0.49669000 |
| C | -3.38527600 | 1.72420900  | 0.33655600  |
| C | -6.41524000 | -0.12093500 | -0.81916500 |
| H | -3.70275400 | 2.75850200  | 0.25646800  |
| H | -7.43240000 | -0.00611900 | -1.17580800 |
| H | -2.26978900 | -1.96345500 | 0.61816100  |
| C | -1.15431700 | 2.58800400  | 1.15740200  |
| H | -0.17990700 | 2.50116900  | 0.66321900  |
| H | -1.58779100 | 3.55170000  | 0.88053100  |
| H | -0.96232500 | 2.61731800  | 2.23650400  |
| C | -6.17223200 | 2.35446900  | -0.61543100 |
| H | -5.56067500 | 2.94716500  | -1.30509400 |
| H | -7.19962300 | 2.35829600  | -0.98296600 |
| H | -6.15411900 | 2.86460900  | 0.35423500  |
| O | -4.64488700 | -1.67841700 | -0.25234900 |
| O | -6.58550100 | -2.48807200 | -1.00593900 |
| H | 4.54357400  | 0.59875700  | 1.74064300  |
| H | 3.11701700  | -1.21208600 | 0.15356600  |
| H | 2.48124700  | 1.28092700  | 0.10831700  |
| C | 3.33533000  | -3.22808300 | -0.16109400 |
| H | 4.01700000  | -3.92169100 | -0.65645300 |
| H | 3.29267600  | -3.44083800 | 0.90672100  |
| H | 2.33548600  | -3.32848300 | -0.57805200 |

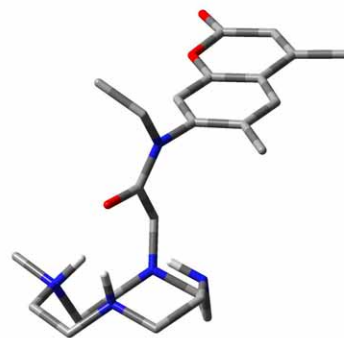

4.[2424].2.iei

|   |             |             |             |
|---|-------------|-------------|-------------|
| C | 1.67751900  | 2.12335700  | -0.60650200 |
| N | 1.59155400  | 1.43497200  | 0.68107700  |
| C | 2.27374200  | 2.11271000  | 1.78599700  |
| C | 5.57259700  | 0.85409900  | 0.46817400  |
| N | 4.35424400  | 0.89829200  | 1.26577900  |
| C | 3.81081600  | 2.20045500  | 1.63116500  |
| C | 1.11165800  | 1.22738900  | -1.72216800 |
| N | 1.68849300  | -0.11572000 | -1.77421700 |
| C | 2.78455000  | -0.34058800 | -2.71556100 |
| C | 5.69450200  | -0.48964200 | -0.28859700 |
| N | 4.55045300  | -0.89439800 | -1.09322800 |
| C | 4.17314100  | 0.01459900  | -2.16459700 |
| H | 4.05874000  | 2.89842100  | 0.82408700  |
| H | 4.24425300  | 2.63312200  | 2.55081600  |
| H | 2.03974000  | 1.55864600  | 2.70491600  |
| H | 1.85867200  | 3.12012600  | 1.91578900  |
| H | 2.61792700  | 0.23760400  | -3.64046000 |
| H | 2.79617900  | -1.40094700 | -2.98911400 |
| H | 4.90103300  | -0.07038700 | -2.98638500 |
| H | 4.16417200  | 1.07979400  | -1.87316900 |
| H | 1.26086500  | 1.73562900  | -2.68767200 |
| H | 0.02976700  | 1.13756900  | -1.57390800 |
| H | 2.70549600  | 2.41865100  | -0.87440400 |
| H | 1.08424000  | 3.04700200  | -0.56463400 |
| H | 5.87969200  | -1.29028700 | 0.44008800  |
| H | 6.59021600  | -0.44186900 | -0.92458100 |
| H | 5.51844800  | 1.67639100  | -0.25446300 |
| H | 6.49984600  | 1.01964600  | 1.04856500  |
| C | 0.79964200  | -1.21302200 | -1.45471200 |
| H | 1.09249300  | -2.09880700 | -2.03248800 |
| H | -0.23835100 | -0.98853000 | -1.72592900 |
| C | 0.89793600  | -1.68104800 | 0.01332700  |
| O | 1.99414600  | -1.89674700 | 0.52523700  |
| N | -0.27023200 | -1.97088900 | 0.68900100  |
| C | -0.13973800 | -2.57550900 | 2.03280800  |
| H | -1.05868000 | -3.13527400 | 2.22909200  |
| H | 0.68937600  | -3.28359800 | 1.98110000  |
| C | 0.10950600  | -1.55320300 | 3.14232300  |
| H | 1.04335200  | -1.01800800 | 2.95832700  |
| H | -0.70512500 | -0.82610300 | 3.20746500  |
| H | 0.18641800  | -2.06406100 | 4.10800000  |
| C | -1.69400000 | -0.00330800 | 0.49507500  |
| C | -2.92829300 | 0.57926000  | 0.20785300  |
| C | -1.53782300 | -1.38369000 | 0.36315900  |
| C | -4.02854300 | -0.20086600 | -0.19243700 |
| C | -2.61629900 | -2.20524200 | -0.04485200 |
| C | -4.19434800 | 2.63182500  | 0.09016300  |
| C | -5.28613200 | 0.47901700  | -0.46702500 |
| C | -3.83661400 | -1.58990400 | -0.31068900 |
| C | -5.33630300 | 1.82702200  | -0.32272700 |
| H | -4.66857100 | -2.20810400 | -0.63285500 |
| H | -6.24479500 | 2.38739000  | -0.51199900 |
| H | -0.85405800 | 0.61910700  | 0.79775600  |
| C | -2.45511400 | -3.69667400 | -0.20922700 |
| H | -2.47839600 | -4.21980800 | 0.75442600  |
| H | -3.26009100 | -4.10858900 | -0.82320800 |
| H | -1.49940500 | -3.94354300 | -0.67970000 |
| C | -6.49463900 | -0.30587300 | -0.89859600 |
| H | -6.76973500 | -1.05175400 | -0.14441300 |
| H | -7.35141100 | 0.35162000  | -1.05790000 |
| H | -6.30016900 | -0.84744800 | -1.83128300 |
| O | -3.01305700 | 1.93479100  | 0.34095900  |
| O | -4.18414300 | 3.83212600  | 0.23027700  |
| H | 4.41473400  | 0.27870100  | 2.06800000  |
| H | 3.74726300  | -1.04433800 | -0.48385500 |
| H | 2.08214500  | 0.54789600  | 0.55921500  |

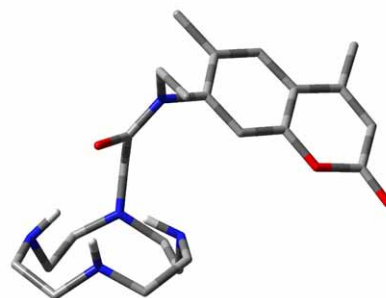

[4.**[2424].2.iei.N4-CH<sub>3</sub>**]<sup>+</sup>

|   |             |             |             |
|---|-------------|-------------|-------------|
| C | 1.59290000  | 2.46196800  | -0.94176200 |
| N | 1.43941200  | 2.01162100  | 0.43758700  |
| C | 2.17322400  | 2.78613900  | 1.43788500  |
| C | 5.37535200  | 0.93690400  | 0.66120900  |
| N | 4.08992700  | 1.24086000  | 1.26617200  |
| C | 3.70742400  | 2.65916800  | 1.33666500  |
| C | 0.98805800  | 1.42891800  | -1.89862800 |
| N | 1.54294400  | 0.07406600  | -1.74692800 |
| C | 2.68059800  | -0.28025200 | -2.57221100 |
| C | 5.43580100  | -0.51225800 | 0.17625400  |
| N | 4.27670900  | -0.94955500 | -0.69513600 |
| C | 4.05889000  | -0.08311600 | -1.90967200 |
| H | 4.06268300  | 3.14214900  | 0.42221100  |
| H | 4.17912000  | 3.19216900  | 2.17425900  |
| H | 1.84914300  | 2.44510700  | 2.42720700  |
| H | 1.89124300  | 3.84084600  | 1.36851900  |
| H | 2.70379900  | 0.34445400  | -3.47587300 |
| H | 2.57742200  | -1.31104600 | -2.92470400 |
| H | 4.86244100  | -0.30005500 | -2.61922000 |
| H | 4.14910500  | 0.94934400  | -1.58506500 |
| H | 1.12319200  | 1.77306600  | -2.93253700 |
| H | -0.08658800 | 1.37912700  | -1.71201100 |
| H | 2.64249000  | 2.65099000  | -1.23011600 |
| H | 1.06235900  | 3.41086200  | -1.07595400 |
| H | 5.42927000  | -1.19616900 | 1.02768300  |
| H | 6.35531300  | -0.68654800 | -0.38785800 |
| H | 5.53451400  | 1.62405800  | -0.17312700 |
| H | 6.24265400  | 1.07580600  | 1.32651100  |
| C | 0.62796700  | -0.97076400 | -1.32548800 |
| H | 0.81656900  | -1.89356300 | -1.89039200 |
| H | -0.40240900 | -0.68794400 | -1.53625300 |
| C | 0.80200600  | -1.36613000 | 0.15311900  |
| O | 1.95114500  | -1.51046500 | 0.60747400  |
| N | -0.29003300 | -1.62023000 | 0.90439700  |
| C | -0.10929700 | -2.12801500 | 2.28781800  |
| H | -0.97762400 | -2.74833100 | 2.51293400  |
| H | 0.77387500  | -2.76598800 | 2.28268900  |
| C | 0.03380700  | -1.01647000 | 3.32577600  |
| H | 0.91390900  | -0.40424100 | 3.12188800  |
| H | -0.84572600 | -0.36969900 | 3.34571600  |
| H | 0.14728800  | -1.45853800 | 4.31887800  |
| C | -1.96096800 | 0.11132200  | 0.55344200  |
| C | -3.24849600 | 0.51195000  | 0.20670400  |
| C | -1.62790900 | -1.23895000 | 0.51549100  |
| C | -4.22427700 | -0.42872900 | -0.16192700 |
| C | -2.57071600 | -2.21954100 | 0.14674700  |
| C | -4.76051700 | 2.37063000  | -0.08669100 |
| C | -5.55468600 | 0.06199700  | -0.50211300 |
| C | -3.85182700 | -1.78243200 | -0.18262600 |
| C | -5.77818600 | 1.39623400  | -0.45354900 |
| H | -4.58762700 | -2.52207200 | -0.47453200 |
| H | -6.74478200 | 1.82054600  | -0.69338600 |
| H | -1.22793000 | 0.85991700  | 0.83329800  |
| C | -2.23164100 | -3.68978700 | 0.10383300  |
| H | -2.30604400 | -4.14998900 | 1.09469000  |
| H | -2.91999900 | -4.22457600 | -0.55221200 |
| H | -1.21554700 | -3.86475400 | -0.25606500 |
| C | -6.64164500 | -0.89872400 | -0.89188600 |
| H | -6.83829700 | -1.61603500 | -0.08920200 |
| H | -7.56869200 | -0.36903000 | -1.10934800 |
| H | -6.35998900 | -1.47274100 | -1.78008700 |
| O | -3.50271200 | 1.84560700  | 0.24227500  |
| O | -4.89383800 | 3.56168700  | -0.04280900 |
| H | 4.00461600  | 0.80290800  | 2.17833600  |
| H | 3.38851600  | -0.91553600 | -0.12795400 |
| H | 1.79667900  | 1.06162800  | 0.48810000  |
| C | 4.45661900  | -2.38986600 | -1.06011400 |
| H | 5.35679700  | -2.49919800 | -1.66481000 |
| H | 4.54494100  | -2.97337900 | -0.14584600 |
| H | 3.58895800  | -2.73670600 | -1.61419000 |

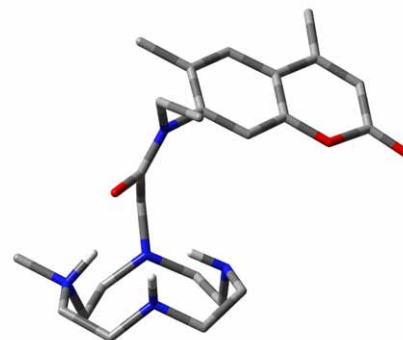

4.[2424].3.iii

|   |             |             |             |
|---|-------------|-------------|-------------|
| C | 2.95288500  | 1.69659200  | -1.67201900 |
| N | 2.78726300  | 1.953226300 | -0.24353200 |
| C | 3.94858100  | 2.54780900  | 0.43122100  |
| C | 6.01465900  | -0.57601300 | 0.11389900  |
| N | 5.13731000  | 0.39581200  | 0.75710100  |
| C | 5.27834500  | 1.77392800  | 0.30027400  |
| C | 1.82936800  | 0.79238400  | -2.19962800 |
| N | 1.73818800  | -0.51352100 | -1.54499800 |
| C | 2.42568600  | -1.63465000 | -2.18865400 |
| C | 5.39871200  | -1.99190100 | 0.16020800  |
| N | 4.06623800  | -2.14933000 | -0.41862600 |
| C | 3.90895400  | -1.77720300 | -1.81658200 |
| H | 5.62767800  | 1.82243400  | -0.74861700 |
| H | 6.04135500  | 2.29907600  | 0.89295600  |
| H | 3.69069000  | 2.63596500  | 1.49260500  |
| H | 4.09784100  | 3.56615100  | 0.05023300  |
| H | 2.35122400  | -1.54565800 | -3.28555800 |
| H | 1.91885600  | -2.56230300 | -1.90142500 |
| H | 4.34429700  | -2.56305000 | -2.45329400 |
| H | 4.42669600  | -0.84342300 | -2.09446400 |
| H | 1.97433600  | 0.65722200  | -3.28315100 |
| H | 0.87577700  | 1.31811800  | -2.06675800 |
| H | 3.92004700  | 1.23389100  | -1.92178000 |
| H | 2.91594300  | 2.65162300  | -2.21596500 |
| H | 5.33419600  | -2.31239200 | 1.20616300  |
| H | 6.08996000  | -2.68151700 | -0.34325300 |
| H | 6.22867000  | -0.30148000 | -0.93721800 |
| H | 6.99010800  | -0.60544900 | 0.62041900  |
| C | 0.53640200  | -0.77753700 | -0.78817300 |
| H | 0.23246800  | -1.82599600 | -0.91028600 |
| H | -0.30423800 | -0.17453700 | -1.15012400 |
| C | 0.71780400  | -0.56639500 | 0.73172100  |
| O | 1.81088500  | -0.74400400 | 1.27419800  |
| N | -0.37661700 | -0.19524300 | 1.46805000  |
| C | -0.21848200 | -0.05167000 | 2.93179100  |
| H | 0.78262100  | 0.34507500  | 3.11202700  |
| H | -0.95127500 | 0.68828300  | 3.26555200  |
| C | -0.40647000 | -1.37095600 | 3.68026600  |
| H | -1.40525800 | -1.78661100 | 3.51413200  |
| H | 0.33918300  | -2.10076200 | 3.35530000  |
| H | -0.28152800 | -1.21178400 | 4.75627600  |
| C | -2.56981300 | -0.90803500 | 0.67022000  |
| C | -3.82740400 | -0.61336500 | 0.14253200  |
| C | -1.65553300 | 0.11717700  | 0.89771300  |
| C | -4.19128600 | 0.71038900  | -0.16124400 |
| C | -1.98251400 | 1.46537200  | 0.60981300  |
| C | -5.95592100 | -1.49242400 | -0.58027500 |
| C | -5.52012000 | 0.94370200  | -0.71069500 |
| C | -3.24581100 | 1.72407000  | 0.08395900  |
| C | -6.33691900 | -0.12289200 | -0.89848700 |
| H | -3.50813500 | 2.75122700  | -0.14796900 |
| H | -7.33630600 | -0.01102100 | -1.30324200 |
| H | -2.31678500 | -1.93766900 | 0.89544200  |
| C | -1.00094500 | 2.58566700  | 0.85889200  |
| H | -0.01438000 | 2.38915800  | 0.42479900  |
| H | -1.37570700 | 3.52285800  | 0.43970700  |
| H | -0.84274500 | 2.74704300  | 1.93170500  |
| C | -5.96318100 | 2.33866800  | -1.05650800 |
| H | -5.30074600 | 2.78778700  | -1.80507600 |
| H | -6.97929600 | 2.33854400  | -1.45530500 |
| H | -5.94091800 | 2.98897300  | -0.17476600 |
| O | -4.67136500 | -1.66424400 | -0.05831200 |
| O | -6.64130500 | -2.47567100 | -0.72664200 |
| H | 3.35847300  | -1.69114400 | 0.15228500  |
| H | 2.56168700  | 1.07297400  | 0.21342800  |
| H | 4.18083600  | 0.09658300  | 0.59383600  |

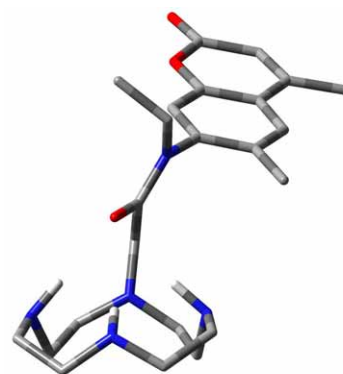



4.[2424].4.iei

|   |             |             |             |
|---|-------------|-------------|-------------|
| C | -3.89318200 | -2.21367000 | -1.32853700 |
| N | -4.05355600 | -2.18713300 | 0.11683800  |
| C | -5.40429200 | -1.94939400 | 0.60559800  |
| C | -5.32338000 | 1.79395000  | -0.06696300 |
| N | -5.14906300 | 0.50847400  | 0.59352800  |
| C | -6.04110700 | -0.58670200 | 0.24218800  |
| C | -2.40708800 | -2.14076800 | -1.70898300 |
| N | -1.75972500 | -0.86581200 | -1.39827800 |
| C | -1.92158100 | 0.21812500  | -2.36559200 |
| C | -3.96771400 | 2.53597600  | -0.16366500 |
| N | -2.85747700 | 1.72563000  | -0.66584000 |
| C | -3.03732700 | 1.21940100  | -2.02316600 |
| H | -6.20937700 | -0.53577400 | -0.83994400 |
| H | -7.04267100 | -0.52683200 | 0.70946300  |
| H | -5.37572100 | -2.04117400 | 1.70003300  |
| H | -6.07017700 | -2.74824700 | 0.24949300  |
| H | -2.12147600 | -0.20156900 | -3.36414500 |
| H | -0.97681000 | 0.77121000  | -2.43442800 |
| H | -2.98584300 | 2.05639200  | -2.73459600 |
| H | -4.01222800 | 0.73077100  | -2.18412700 |
| H | -2.31175500 | -2.36547900 | -2.78563000 |
| H | -1.88657300 | -2.93254900 | -1.16010900 |
| H | -4.42720200 | -1.40648900 | -1.86084200 |
| H | -4.29945700 | -3.15763300 | -1.72356700 |
| H | -3.68428600 | 2.89224200  | 0.83557400  |
| H | -4.08848600 | 3.42955900  | -0.79058200 |
| H | -5.70531900 | 1.59646700  | -1.07463600 |
| H | -6.06602700 | 2.45728600  | 0.41287400  |
| C | -0.53747300 | -0.88314200 | -0.63350700 |
| H | 0.22542900  | -0.25802000 | -1.10770200 |
| H | -0.11023700 | -1.89675700 | -0.60287200 |
| C | -0.69724500 | -0.47132800 | 0.84860700  |
| O | -1.77671300 | -0.53279500 | 1.43081400  |
| N | 0.45500900  | -0.13953000 | 1.53011400  |
| C | 0.39764100  | -0.07304100 | 3.00507700  |
| H | -0.39221800 | -0.75918500 | 3.31598800  |
| H | 1.35217200  | -0.45024500 | 3.38516400  |
| C | 0.11768200  | 1.32268700  | 3.56224000  |
| H | 0.91332200  | 2.02812700  | 3.30398800  |
| H | -0.83200200 | 1.70319600  | 3.17801300  |
| H | 0.05329900  | 1.27861400  | 4.65469500  |
| C | 2.71029600  | -0.82984000 | 0.94880800  |
| C | 3.94502700  | -0.59744700 | 0.34598400  |
| C | 1.70415700  | 0.13230400  | 0.87988500  |
| C | 4.19399700  | 0.59921600  | -0.34902300 |
| C | 1.92096400  | 1.36232300  | 0.20781700  |
| C | 6.14449700  | -1.47106100 | -0.12732900 |
| C | 5.50085600  | 0.76945000  | -0.96801400 |
| C | 3.16119600  | 1.55351900  | -0.39884600 |
| C | 6.40811400  | -0.23196900 | -0.84623000 |
| H | 3.33864900  | 2.48686900  | -0.92332900 |
| H | 7.39657000  | -0.16211600 | -1.28577000 |
| H | 2.54112300  | -1.77099500 | 1.46013200  |
| C | 0.87033200  | 2.44749100  | 0.15075200  |
| H | 0.67088100  | 2.85471900  | 1.14709000  |
| H | 1.21398800  | 3.27186100  | -0.47958300 |
| H | -0.09609800 | 2.10877400  | -0.23855600 |
| C | 5.82381500  | 2.02969100  | -1.72260400 |
| H | 5.73742100  | 2.90914400  | -1.07457500 |
| H | 6.83920300  | 1.99711000  | -2.12202400 |
| H | 5.13052300  | 2.17624800  | -2.55849600 |
| O | 4.87875900  | -1.58539500 | 0.45141400  |
| O | 6.91360900  | -2.39208000 | 0.01132400  |
| H | -5.06090500 | 0.61018600  | 1.59985000  |
| H | -2.80624200 | 0.90672400  | -0.05853500 |
| H | -3.43215400 | -1.47628700 | 0.50174200  |

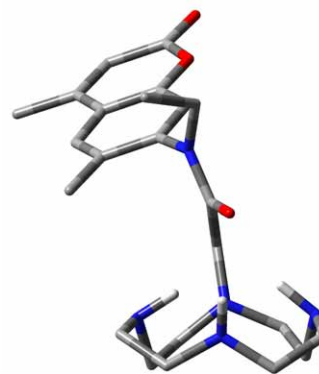

[4.[2424].4.iei.N10-CH<sub>3</sub>]<sup>+</sup>

|   |             |             |             |
|---|-------------|-------------|-------------|
| C | -3.77103500 | -1.72245100 | -1.61011700 |
| N | -3.78270700 | -1.94548000 | -0.11968100 |
| C | -5.14160000 | -1.76731600 | 0.52182700  |
| C | -5.06349200 | 2.01436700  | 0.20831900  |
| N | -4.79507200 | 0.65620900  | 0.69902100  |
| C | -5.75303200 | -0.37523500 | 0.34646500  |
| C | -2.35309800 | -1.52256400 | -2.18600600 |
| N | -1.63922000 | -0.36875500 | -1.67507700 |
| C | -1.74925900 | 0.88710500  | -2.43400100 |
| C | -3.74400000 | 2.81526600  | 0.14486500  |
| N | -2.64436500 | 2.11058900  | -0.51333000 |
| C | -2.85315100 | 1.82186400  | -1.92723500 |
| H | -6.05764000 | -0.22097400 | -0.69372200 |
| H | -6.68864700 | -0.37212200 | 0.93248900  |
| H | -4.98838800 | -1.97896500 | 1.58387100  |
| H | -5.80472400 | -2.53824300 | 0.11785500  |
| H | -1.92148000 | 0.66603600  | -3.49700400 |
| H | -0.79364000 | 1.41494500  | -2.36337000 |
| H | -2.81341100 | 2.75622400  | -2.50161700 |
| H | -3.83588300 | 1.36605100  | -2.15097500 |
| H | -2.49249500 | -1.44073100 | -3.27451100 |
| H | -1.75471600 | -2.42726500 | -2.02978500 |
| H | -4.36213100 | -0.82949900 | -1.80343800 |
| H | -4.26463800 | -2.57952300 | -2.08026800 |
| H | -3.41923300 | 3.05600700  | 1.16476400  |
| H | -3.92688400 | 3.77201900  | -0.35734500 |
| H | -5.49347900 | 1.92368600  | -0.79487200 |
| H | -5.80346100 | 2.55968700  | 0.81413500  |
| C | -0.42676800 | -0.58008700 | -0.91117500 |
| H | 0.34428300  | 0.12568800  | -1.22435000 |
| H | -0.00657100 | -1.57954300 | -1.10396700 |
| C | -0.62348600 | -0.49214300 | 0.61749800  |
| O | -1.73623500 | -0.73459300 | 1.12935800  |
| N | 0.45443900  | -0.22275900 | 1.38637200  |
| C | 0.34571800  | -0.36971000 | 2.86035600  |
| H | -0.44084300 | -1.10274300 | 3.04563100  |
| H | 1.29490500  | -0.78850100 | 3.20423200  |
| C | 0.03632600  | 0.93200000  | 3.59682100  |
| H | 0.84229400  | 1.66148300  | 3.48445800  |
| H | -0.89421900 | 1.37514200  | 3.23294800  |
| H | -0.07756900 | 0.72539500  | 4.66541400  |
| C | 2.68580900  | -0.92562500 | 0.74100400  |
| C | 3.96243200  | -0.66472600 | 0.24516100  |
| C | 1.74993100  | 0.10233800  | 0.83152000  |
| C | 4.32025700  | 0.63101500  | -0.17059300 |
| C | 2.06448200  | 1.42105500  | 0.43037500  |
| C | 6.12744400  | -1.57356000 | -0.31324900 |
| C | 5.67238100  | 0.83766800  | -0.68016500 |
| C | 3.35001100  | 1.64223900  | -0.06872100 |
| C | 6.50648500  | -0.22973800 | -0.73342400 |
| H | 3.61022300  | 2.64666700  | -0.38548200 |
| H | 7.52244900  | -0.14038900 | -1.10070900 |
| H | 2.44066600  | -1.93512600 | 1.05281500  |
| C | 1.08423700  | 2.56776500  | 0.52998300  |
| H | 0.95200100  | 2.89009600  | 1.56801900  |
| H | 1.45463100  | 3.42918000  | -0.03086300 |
| H | 0.08681500  | 2.32748400  | 0.14755600  |
| C | 6.11466000  | 2.20347800  | -1.12637200 |
| H | 6.04667600  | 2.92686600  | -0.30603200 |
| H | 7.14770400  | 2.18376300  | -1.47730700 |
| H | 5.48435500  | 2.57721300  | -1.94129500 |
| O | 4.81955700  | -1.71534900 | 0.17834100  |
| O | 6.81992900  | -2.55780300 | -0.34883500 |
| H | -4.62734000 | 0.66863100  | 1.70211500  |
| H | -2.55634900 | 1.21436900  | -0.03755200 |
| H | -3.10630200 | -1.24137000 | 0.29802300  |
| C | -3.23603800 | -3.28840600 | 0.25160400  |
| H | -3.17792900 | -3.35289400 | 1.33777600  |
| H | -3.89209900 | -4.06867000 | -0.13813900 |
| H | -2.23575400 | -3.40434100 | -0.15999000 |

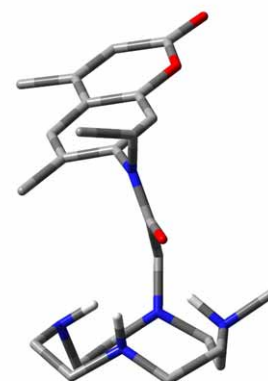

[4.**[2424]**.4.iei.N4-CH<sub>3</sub>]<sup>+</sup>

|   |             |             |             |
|---|-------------|-------------|-------------|
| C | 1.51889800  | 2.47136800  | -0.92297400 |
| N | 1.38271900  | 2.030005400 | 0.46214500  |
| C | 2.10909400  | 2.83584400  | 1.44463100  |
| C | 5.35934700  | 1.04645200  | 0.69526100  |
| N | 4.04415000  | 1.32686400  | 1.24268500  |
| C | 3.64607700  | 2.73870700  | 1.32970800  |
| C | 0.94499700  | 1.41047900  | -1.87025700 |
| N | 1.57265600  | 0.08623400  | -1.73929000 |
| C | 2.72312400  | -0.20879700 | -2.56767100 |
| C | 5.45303800  | -0.40298600 | 0.21015400  |
| N | 4.30523000  | -0.85044600 | -0.67024100 |
| C | 4.09239900  | 0.01105300  | -1.88880100 |
| H | 3.98619500  | 3.23207100  | 0.41257700  |
| H | 4.11820400  | 3.27649600  | 2.16653500  |
| H | 1.80338100  | 2.49920300  | 2.44329800  |
| H | 1.80366500  | 3.88477600  | 1.36480600  |
| H | 2.73247700  | 0.44409000  | -3.45261500 |
| H | 2.65506900  | -1.23271500 | -2.95427400 |
| H | 4.91118600  | -0.19184300 | -2.58738800 |
| H | 4.15866700  | 1.04551400  | -1.55953400 |
| H | 1.03516100  | 1.76602800  | -2.90685200 |
| H | -0.12170500 | 1.30161800  | -1.65416300 |
| H | 2.56149600  | 2.69029800  | -1.22132400 |
| H | 0.95863800  | 3.40387700  | -1.06476200 |
| H | 5.44540600  | -1.08921400 | 1.06185700  |
| H | 6.38159400  | -0.56533500 | -0.34544400 |
| H | 5.54109500  | 1.73636400  | -0.13492200 |
| H | 6.20096200  | 1.19631400  | 1.39311800  |
| C | 0.72824400  | -1.00442300 | -1.28470400 |
| H | 1.01993700  | -1.93913100 | -1.78185100 |
| H | -0.31692700 | -0.82176400 | -1.54383000 |
| C | 0.88746200  | -1.26222800 | 0.22565600  |
| O | 2.03836900  | -1.37269900 | 0.70177500  |
| N | -0.21226200 | -1.36580800 | 1.00248900  |
| C | -0.04897800 | -1.51373200 | 2.47232000  |
| H | 0.98161800  | -1.24174500 | 2.69967000  |
| H | -0.71217700 | -0.78038300 | 2.93896500  |
| C | -0.35893800 | -2.91656100 | 2.98931600  |
| H | -1.39388400 | -3.20456300 | 2.78582900  |
| H | 0.30905200  | -3.65876300 | 2.54268900  |
| H | -0.21483800 | -2.94253600 | 4.07363500  |
| C | -2.00234500 | 0.23285000  | 0.67870600  |
| C | -3.30163900 | 0.56124100  | 0.29625000  |
| C | -1.54750800 | -1.07649600 | 0.52350400  |
| C | -4.16600800 | -0.41484100 | -0.23749000 |
| C | -2.36745100 | -2.08271200 | -0.02824700 |
| C | -4.96423200 | 2.30179400  | 0.11617200  |
| C | -5.51979800 | -0.00718800 | -0.60079000 |
| C | -3.66647400 | -1.71815600 | -0.39100200 |
| C | -5.86825800 | 1.28998700  | -0.41814600 |
| H | -4.31535800 | -2.47985900 | -0.81053900 |
| H | -6.85812900 | 1.65435100  | -0.66814200 |
| H | -1.34365000 | 1.00499800  | 1.06403400  |
| C | -1.87588400 | -3.48791200 | -0.28491500 |
| H | -1.17074000 | -3.82745900 | 0.47523500  |
| H | -2.71171600 | -4.19123700 | -0.30994400 |
| H | -1.36910000 | -3.55973600 | -1.25605300 |
| C | -6.48993000 | -1.01048000 | -1.15973100 |
| H | -6.66003600 | -1.83017000 | -0.45262100 |
| H | -7.45192700 | -0.54368900 | -1.37739200 |
| H | -6.10888900 | -1.45510200 | -2.08609800 |
| O | -3.67991600 | 1.85534000  | 0.46174400  |
| O | -5.21469700 | 3.46777300  | 0.28414500  |
| H | 3.92283700  | 0.86911500  | 2.14309200  |
| H | 3.40909200  | -0.81656300 | -0.10208800 |
| H | 1.79060100  | 1.09858800  | 0.51451500  |
| C | 4.48808700  | -2.29308400 | -1.02236500 |
| H | 4.55924700  | -2.87059300 | -0.10101500 |
| H | 3.62791300  | -2.64283000 | -1.58929700 |
| H | 5.39815200  | -2.41115200 | -1.61304700 |

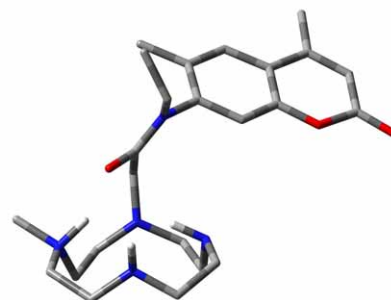

4.[2424].5.iei

|   |             |             |             |
|---|-------------|-------------|-------------|
| C | -4.15454700 | -0.25409600 | 2.10901600  |
| N | -4.53775500 | 0.69529700  | 1.07517100  |
| C | -5.67290000 | 0.31044600  | 0.24805200  |
| C | -3.72814400 | -2.23643500 | -1.80071400 |
| N | -4.30120800 | -0.96840300 | -1.36768300 |
| C | -5.52296700 | -0.99076900 | -0.57525900 |
| C | -2.77566500 | 0.09782700  | 2.68542700  |
| N | -1.67178400 | -0.05840300 | 1.73944800  |
| C | -1.07286600 | -1.38788400 | 1.62031800  |
| C | -2.19243100 | -2.10719700 | -1.94048700 |
| N | -1.53115500 | -1.47660000 | -0.79575200 |
| C | -1.61463300 | -2.23251600 | 0.45352500  |
| H | -5.45482400 | -1.84787300 | 0.10458200  |
| H | -6.44495600 | -1.14425500 | -1.16736400 |
| H | -5.87109200 | 1.14267500  | -0.44089500 |
| H | -6.56876000 | 0.21511900  | 0.87824600  |
| H | -1.22211500 | -1.94859500 | 2.55620500  |
| H | 0.00852900  | -1.27308800 | 1.48702800  |
| H | -1.00462100 | -3.14215600 | 0.36836400  |
| H | -2.63911200 | -2.55963400 | 0.69653600  |
| H | -2.60287800 | -0.52382200 | 3.58057800  |
| H | -2.80825800 | 1.14246600  | 3.01242100  |
| H | -4.12788200 | -1.30537000 | 1.77162300  |
| H | -4.88930000 | -0.21548900 | 2.92809900  |
| H | -1.96636400 | -1.49717400 | -2.82501600 |
| H | -1.75490000 | -3.09674700 | -2.12304700 |
| H | -3.96618500 | -2.98341600 | -1.03572100 |
| H | -4.14677600 | -2.62616100 | -2.74609400 |
| C | -0.79821300 | 1.06732100  | 1.48744600  |
| H | 0.24057900  | 0.85111400  | 1.76350000  |
| H | -1.11555900 | 1.91960800  | 2.10174900  |
| C | -0.88202600 | 1.60316000  | 0.04180600  |
| O | -1.97244500 | 1.78079500  | -0.49550500 |
| N | 0.28833500  | 1.99889200  | -0.57841000 |
| C | 0.14601400  | 2.64818400  | -1.90626900 |
| H | 1.14118200  | 2.66240600  | -2.35678400 |
| H | -0.49351400 | 2.01221100  | -2.52829100 |
| C | -0.43490900 | 4.05996900  | -1.84086600 |
| H | -1.43948700 | 4.04031700  | -1.41611400 |
| H | 0.19144200  | 4.72430200  | -1.23876200 |
| H | -0.49802700 | 4.47586000  | -2.85198000 |
| C | 1.67308100  | -0.00528700 | -0.52230600 |
| C | 2.89635400  | -0.63176300 | -0.28517400 |
| C | 1.54971400  | 1.36712000  | -0.30264900 |
| C | 4.01894100  | 0.09692100  | 0.14859100  |
| C | 2.65268700  | 2.13830000  | 0.13449400  |
| C | 4.11473700  | -2.71625100 | -0.30551800 |
| C | 5.26264600  | -0.62690700 | 0.36812300  |
| C | 3.86123700  | 1.48079500  | 0.34839800  |
| C | 5.27939800  | -1.96460100 | 0.14276800  |
| H | 4.71165800  | 2.06110400  | 0.69193400  |
| H | 6.17599900  | -2.55630400 | 0.28830700  |
| H | 0.81873500  | -0.59242900 | -0.85703500 |
| C | 2.53324600  | 3.62279300  | 0.37368500  |
| H | 1.60487800  | 3.86762600  | 0.89713300  |
| H | 3.37389300  | 3.98950600  | 0.96832800  |
| H | 2.52615100  | 4.18583400  | -0.56706700 |
| C | 6.49343500  | 0.10262600  | 0.83252100  |
| H | 6.31868500  | 0.59707700  | 1.79479400  |
| H | 7.33440300  | -0.58369400 | 0.94871000  |
| H | 6.78253800  | 0.88173900  | 0.11813300  |
| O | 2.94799200  | -1.97854800 | -0.50066100 |
| O | 4.07505700  | -3.90546300 | -0.51745100 |
| H | -4.36813800 | -0.30556900 | -2.13395600 |
| H | -2.03562600 | -0.60392800 | -0.63398800 |
| H | -3.73327700 | 0.87644700  | 0.47579400  |

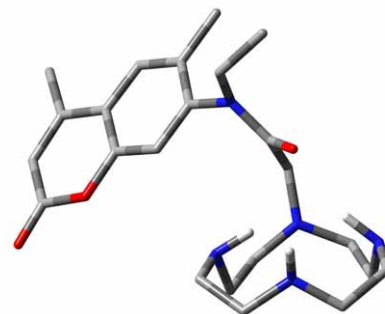

[4.[2424].5.iei.NII-CH<sub>3</sub>]<sup>+</sup>

|   |             |             |             |
|---|-------------|-------------|-------------|
| C | -4.01877200 | -0.33391000 | 1.87709200  |
| N | -4.25179800 | 0.65876900  | 0.76759600  |
| C | -5.38046000 | 0.28299700  | -0.16971200 |
| C | -3.45393600 | -2.61828400 | -1.67506200 |
| N | -3.90678700 | -1.24748800 | -1.40159500 |
| C | -5.23211600 | -1.09020000 | -0.83085600 |
| C | -2.65799000 | -0.15721100 | 2.58564600  |
| N | -1.49835700 | -0.32100000 | 1.73327600  |
| C | -0.83805200 | -1.63612100 | 1.71391600  |
| C | -1.91336900 | -2.64037800 | -1.77993900 |
| N | -1.23312700 | -1.94725300 | -0.68464900 |
| C | -1.36290100 | -2.58027000 | 0.62513500  |
| H | -5.38745100 | -1.88532800 | -0.09458300 |
| H | -6.06720300 | -1.18300800 | -1.54642700 |
| H | -5.39548200 | 1.06914200  | -0.93009200 |
| H | -6.31570700 | 0.34282200  | 0.39506700  |
| H | -0.94396000 | -2.12167800 | 2.69447500  |
| H | 0.23066700  | -1.47748600 | 1.54515100  |
| H | -0.76814800 | -3.50165000 | 0.64507800  |
| H | -2.39915400 | -2.87553200 | 0.87550400  |
| H | -2.65093000 | -0.90972500 | 3.38744300  |
| H | -2.61913800 | 0.81557300  | 3.09026300  |
| H | -4.05419100 | -1.32372700 | 1.42742200  |
| H | -4.84566000 | -0.23920500 | 2.58909800  |
| H | -1.61112600 | -2.15842700 | -2.71819300 |
| H | -1.56578100 | -3.67738100 | -1.83797200 |
| H | -3.78284500 | -3.24579400 | -0.83950800 |
| H | -3.89693100 | -3.05308800 | -2.58442400 |
| C | -0.67850900 | 0.83625800  | 1.42306500  |
| H | 0.37166500  | 0.64853500  | 1.65460100  |
| H | -0.98595300 | 1.69106400  | 2.04218200  |
| C | -0.84596000 | 1.31687900  | -0.03177900 |
| O | -1.99457000 | 1.40463200  | -0.51666400 |
| N | 0.23854400  | 1.70664000  | -0.73844400 |
| C | 0.02245800  | 2.24155600  | -2.11269700 |
| H | 1.00257000  | 2.25157500  | -2.59192500 |
| H | -0.60607200 | 1.52549100  | -2.65170100 |
| C | -0.61250600 | 3.63041900  | -2.14933500 |
| H | -1.60325200 | 3.61885300  | -1.69219500 |
| H | 0.00545600  | 4.37042900  | -1.63551000 |
| H | -0.72165100 | 3.94720200  | -3.19102500 |
| C | 1.88038400  | -0.07630700 | -0.55574800 |
| C | 3.16906400  | -0.52899500 | -0.27333700 |
| C | 1.57924600  | 1.27658500  | -0.40031000 |
| C | 4.17678800  | 0.36234800  | 0.14079500  |
| C | 2.55344200  | 2.20719000  | 0.01804500  |
| C | 4.64565700  | -2.43591200 | -0.16198900 |
| C | 5.50567200  | -0.17973300 | 0.40550800  |
| C | 3.83448600  | 1.71831600  | 0.27791200  |
| C | 5.69648700  | -1.51294400 | 0.24953500  |
| H | 4.59555800  | 2.41892200  | 0.60520500  |
| H | 6.66041700  | -1.97487000 | 0.42982000  |
| H | 1.12126200  | -0.78662900 | -0.87476400 |
| C | 2.25101300  | 3.67707600  | 0.17935700  |
| H | 1.25880300  | 3.84428200  | 0.60756000  |
| H | 2.98707900  | 4.15417900  | 0.83060400  |
| H | 2.28078600  | 4.20259100  | -0.78243900 |
| C | 6.62364500  | 0.72868500  | 0.83578100  |
| H | 6.38030100  | 1.23725700  | 1.77555000  |
| H | 7.54792900  | 0.16757600  | 0.98268300  |
| H | 6.81078500  | 1.50534800  | 0.08575600  |
| O | 3.39183400  | -1.86208100 | -0.41735200 |
| O | 4.75266500  | -3.62816600 | -0.29848200 |
| H | -3.79912800 | -0.66735800 | -2.23027400 |
| H | -1.68202400 | -1.03568600 | -0.61547200 |
| H | -3.35124100 | 0.71852200  | 0.20815400  |
| C | -4.48278600 | 2.04330200  | 1.28541500  |
| H | -4.56453600 | 2.72305400  | 0.43759500  |
| H | -5.40110700 | 2.06404700  | 1.87472700  |
| H | -3.63927900 | 2.34926900  | 1.90062600  |

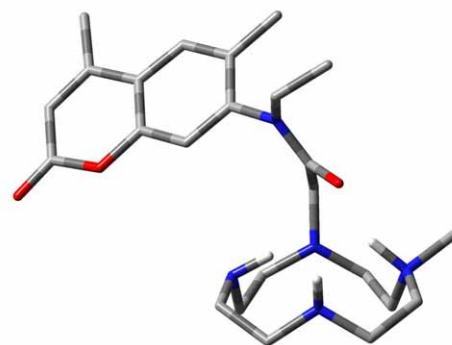

4.[2424].6.iei

|   |             |             |             |
|---|-------------|-------------|-------------|
| C | -1.68834700 | -2.11857900 | -0.62685400 |
| N | -1.66746500 | -1.51671600 | 0.70582800  |
| C | -2.40292700 | -2.26609100 | 1.72729400  |
| C | -5.66310600 | -0.91099600 | 0.38759700  |
| N | -4.45659500 | -1.01260800 | 1.19764600  |
| C | -3.93127700 | -2.33849800 | 1.49632600  |
| C | -1.08309600 | -1.15330600 | -1.66021800 |
| N | -1.70584100 | 0.16953200  | -1.70022300 |
| C | -2.77884700 | 0.38272700  | -2.67030200 |
| C | -5.74970600 | 0.46543900  | -0.31389400 |
| N | -4.58046400 | 0.88740600  | -1.07299400 |
| C | -4.17684200 | 0.00642000  | -2.15777400 |
| H | -4.14167800 | -2.97691400 | 0.63109900  |
| H | -4.40608700 | -2.83375600 | 2.36286600  |
| H | -2.21259200 | -1.77776600 | 2.69242800  |
| H | -1.99542800 | -3.28188600 | 1.80669800  |
| H | -2.57764900 | -0.19103300 | -3.59085500 |
| H | -2.79723400 | 1.44337100  | -2.94287100 |
| H | -4.88800400 | 0.10786300  | -2.99223400 |
| H | -4.16742800 | -1.06511200 | -1.89160700 |
| H | -1.14323800 | -1.62569000 | -2.65386900 |
| H | -0.01971500 | -1.02877500 | -1.42826500 |
| H | -2.69898100 | -2.40580200 | -0.96113400 |
| H | -1.08707400 | -3.03836000 | -0.61743500 |
| H | -5.94127100 | 1.23770400  | 0.44294600  |
| H | -6.63030800 | 0.45675900  | -0.97237600 |
| H | -5.61570300 | -1.70363400 | -0.36770200 |
| H | -6.60073100 | -1.08298200 | 0.94884900  |
| C | -0.86595800 | 1.28829300  | -1.32176300 |
| H | -1.22258100 | 2.19342000  | -1.82551000 |
| H | 0.17752200  | 1.13424900  | -1.62435200 |
| C | -0.96787900 | 1.61044000  | 0.18406600  |
| O | -2.06976500 | 1.81689700  | 0.68776100  |
| N | 0.19400200  | 1.68865000  | 0.92649100  |
| C | 0.07078800  | 1.88050600  | 2.38798800  |
| H | -0.99774400 | 1.95558500  | 2.58897500  |
| H | 0.44785900  | 0.97917000  | 2.88517100  |
| C | 0.80676500  | 3.11330800  | 2.90863000  |
| H | 1.87878900  | 3.07048500  | 2.69155600  |
| H | 0.39791200  | 4.02919200  | 2.47144900  |
| H | 0.69123700  | 3.17777600  | 3.99548500  |
| C | 1.77691000  | -0.13831400 | 0.70728600  |
| C | 3.02013200  | -0.63906200 | 0.32458800  |
| C | 1.46214800  | 1.19708000  | 0.45704500  |
| C | 3.96893900  | 0.18207200  | -0.31294200 |
| C | 2.38219300  | 2.05464200  | -0.19033400 |
| C | 4.46964600  | -2.56812400 | 0.25236900  |
| C | 5.24703600  | -0.40940500 | -0.68257500 |
| C | 3.61512200  | 1.52076700  | -0.56022800 |
| C | 5.45737500  | -1.71952300 | -0.40091500 |
| H | 4.32959900  | 2.16742200  | -1.05928000 |
| H | 6.38835300  | -2.21441600 | -0.65289900 |
| H | 1.03907400  | -0.79623300 | 1.15735300  |
| C | 2.03731800  | 3.48718500  | -0.51775500 |
| H | 1.65576400  | 4.02436800  | 0.35355700  |
| H | 2.91544600  | 4.01971400  | -0.89176600 |
| H | 1.26190400  | 3.54488800  | -1.29066000 |
| C | 6.30008000  | 0.42223900  | -1.36240300 |
| H | 6.58678800  | 1.27930900  | -0.74263300 |
| H | 7.19549700  | -0.16898700 | -1.56336100 |
| H | 5.93276500  | 0.82175900  | -2.31450000 |
| O | 3.26403900  | -1.95456400 | 0.59169800  |
| O | 4.60457000  | -3.73834900 | 0.52116900  |
| H | -4.52157000 | -0.43874900 | 2.03299600  |
| H | -3.79531400 | 1.00874800  | -0.43440700 |
| H | -2.15316700 | -0.62272900 | 0.62260100  |

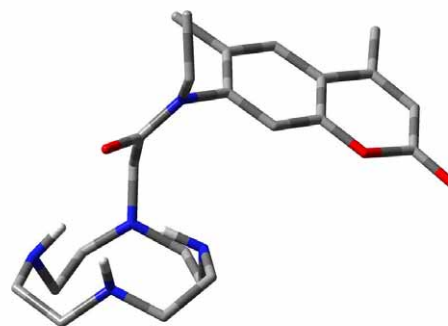

4.[2424].7.ii

|   |             |             |             |
|---|-------------|-------------|-------------|
| C | -4.18664300 | -1.02949200 | -1.76619500 |
| N | -4.28755100 | -1.27405400 | -0.33741400 |
| C | -5.63597000 | -1.31183400 | 0.21872200  |
| C | -5.08422000 | 2.31090900  | 0.80970300  |
| N | -5.17897000 | 0.89629800  | 1.15278500  |
| C | -6.17589500 | 0.11955900  | 0.42358000  |
| C | -2.72925500 | -1.02854000 | -2.25256600 |
| N | -1.82963200 | -0.10539300 | -1.55034500 |
| C | -1.83465400 | 1.27489300  | -2.05052400 |
| C | -3.62812200 | 2.80500100  | 0.93654300  |
| N | -2.63012400 | 2.12294200  | 0.10443300  |
| C | -2.85642900 | 2.17299700  | -1.33606300 |
| H | -6.40681900 | 0.56809900  | -0.56180100 |
| H | -7.12948600 | 0.06963600  | 0.96739500  |
| H | -5.57452900 | -1.80474600 | 1.19494600  |
| H | -6.35214600 | -1.88618300 | -0.39577000 |
| H | -2.02431000 | 1.30647700  | -3.13732800 |
| H | -0.84328000 | 1.70848000  | -1.88612200 |
| H | -2.71755400 | 3.20478300  | -1.68839400 |
| H | -3.87610900 | 1.87985100  | -1.63263100 |
| H | -2.73287500 | -0.82108300 | -3.33851000 |
| H | -2.33637300 | -2.03765000 | -2.11632800 |
| H | -4.66142100 | -0.06849300 | -1.99510100 |
| H | -4.72795200 | -1.78277500 | -2.37346400 |
| H | -3.31033300 | 2.69318000  | 1.97990800  |
| H | -3.59681900 | 3.87749900  | 0.70592400  |
| H | -5.45016700 | 2.51070800  | -0.21504500 |
| H | -5.71362100 | 2.91866200  | 1.47631700  |
| C | -0.50897900 | -0.65399400 | -1.28194100 |
| H | 0.17057300  | 0.16426900  | -1.04986300 |
| H | -0.06601800 | -1.17738400 | -2.15328800 |
| C | -0.50180700 | -1.67721500 | -0.13518200 |
| O | -1.43533000 | -2.45335900 | 0.05634500  |
| N | 0.65152800  | -1.76584400 | 0.61655100  |
| C | 0.77858000  | -2.91089200 | 1.54455300  |
| H | 0.22294700  | -3.73991100 | 1.10228200  |
| H | 1.83710200  | -3.18310400 | 1.58213000  |
| C | 0.24978000  | -2.62504500 | 2.95022500  |
| H | 0.79808200  | -1.80792900 | 3.42902800  |
| H | -0.81129500 | -2.36592200 | 2.91170300  |
| H | 0.36118400  | -3.51587500 | 3.57732300  |
| C | 2.91440300  | -1.29840400 | -0.12059800 |
| C | 4.03171400  | -0.47210300 | -0.20387100 |
| C | 1.75575800  | -0.85380400 | 0.51801400  |
| C | 4.01335100  | 0.82316200  | 0.34512800  |
| C | 1.69919400  | 0.44016300  | 1.09294100  |
| C | 6.30019900  | -0.23495000 | -0.99240900 |
| C | 5.21596600  | 1.63518100  | 0.21995700  |
| C | 2.83409000  | 1.24422700  | 0.98303000  |
| C | 6.28754300  | 1.10553700  | -0.42154400 |
| H | 2.80276400  | 2.23674700  | 1.42091000  |
| H | 7.20946000  | 1.66210000  | -0.54619600 |
| H | 2.95661900  | -2.28772800 | -0.56242600 |
| C | 0.46619800  | 0.96923300  | 1.78602500  |
| H | -0.08107200 | 0.17548100  | 2.29801000  |
| H | 0.74219100  | 1.72504400  | 2.52666900  |
| H | -0.23343000 | 1.44643300  | 1.08694900  |
| C | 5.25437700  | 3.02560200  | 0.79168500  |
| H | 5.07197000  | 3.01155700  | 1.87212400  |
| H | 6.22397200  | 3.49471500  | 0.61447100  |
| H | 4.47977400  | 3.65732000  | 0.34257500  |
| O | 5.12608200  | -0.97548800 | -0.84322100 |
| O | 7.22388900  | -0.75281300 | -1.57339100 |
| H | -4.29884000 | 0.44808300  | 0.89828300  |
| H | -2.56917500 | 1.13658800  | 0.35234000  |
| H | -3.71198400 | -2.06242500 | -0.06224300 |

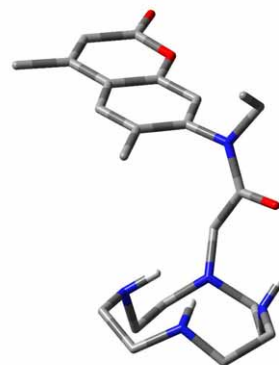

[4.[2424].7.ii.e.N4-CH<sub>3</sub>]<sup>+,1</sup>

|   |             |             |             |
|---|-------------|-------------|-------------|
| C | 3.42712900  | 0.32074000  | -2.00517200 |
| N | 3.77082600  | 0.86131000  | -0.65472500 |
| C | 4.91715000  | 1.81564100  | -0.62716300 |
| C | 6.47751800  | -1.21364200 | -0.17263100 |
| N | 6.70668400  | 0.21820300  | 0.04904100  |
| C | 6.26806800  | 1.17387200  | -0.95897700 |
| C | 1.98268600  | -0.22908500 | -1.98816700 |
| N | 1.60038800  | -0.74375300 | -0.66990900 |
| C | 1.92783500  | -2.14387800 | -0.41851300 |
| C | 5.54266000  | -1.83074400 | 0.87460500  |
| N | 4.10134700  | -1.46293200 | 0.72973900  |
| C | 3.42961300  | -2.41146600 | -0.19202000 |
| H | 6.25206400  | 0.74506500  | -1.97443600 |
| H | 6.98240300  | 2.00312000  | -0.99808800 |
| H | 4.96000900  | 2.22525300  | 0.38479500  |
| H | 4.69586200  | 2.62989300  | -1.32506400 |
| H | 1.60476400  | -2.80963900 | -1.23782000 |
| H | 1.37729100  | -2.46331200 | 0.46916100  |
| H | 3.52099400  | -3.44327600 | 0.18448600  |
| H | 3.96678900  | -2.37980800 | -1.14437600 |
| H | 1.87606900  | -0.98618700 | -2.78070700 |
| H | 1.30738700  | 0.58947100  | -2.24100600 |
| H | 4.15924600  | -0.44979200 | -2.25333600 |
| H | 3.52231600  | 1.11877200  | -2.74695500 |
| H | 5.87932300  | -1.46788200 | 1.84826100  |
| H | 5.64615400  | -2.92615700 | 0.87553000  |
| H | 6.12108700  | -1.40961900 | -1.19507700 |
| H | 7.42676700  | -1.75725200 | -0.09401400 |
| C | 0.26523700  | -0.33401100 | -0.25305200 |
| H | -0.02855800 | -0.91677500 | 0.62452400  |
| H | -0.50732200 | -0.52808800 | -1.01434900 |
| C | 0.23184600  | 1.16664600  | 0.10930300  |
| O | 1.25963400  | 1.85934400  | 0.06383100  |
| N | -0.97712200 | 1.68848100  | 0.44939700  |
| C | -1.13837500 | 3.16122200  | 0.55782900  |
| H | -0.14224900 | 3.58308900  | 0.42901300  |
| H | -1.75704700 | 3.49137800  | -0.28555700 |
| C | -1.75498800 | 3.62921600  | 1.87170300  |
| H | -2.73444400 | 3.17700900  | 2.04984200  |
| H | -1.10455100 | 3.40835600  | 2.72298300  |
| H | -1.89570700 | 4.71332800  | 1.83056300  |
| C | -2.99632400 | 0.90031200  | -0.65587900 |
| C | -4.18709500 | 0.17603600  | -0.65955300 |
| C | -2.17784000 | 0.88800800  | 0.47260000  |
| C | -4.58436600 | -0.56442500 | 0.47137000  |
| C | -2.53737600 | 0.15856800  | 1.62748600  |
| C | -6.15395300 | -0.45384800 | -1.91082900 |
| C | -5.85164900 | -1.28584200 | 0.40686700  |
| C | -3.73974100 | -0.55101300 | 1.59302800  |
| C | -6.57086100 | -1.21607800 | -0.73998100 |
| H | -4.03653500 | -1.10519300 | 2.47704600  |
| H | -7.51937200 | -1.72943400 | -0.84945300 |
| H | -2.72393400 | 1.46725700  | -1.53941200 |
| C | -1.66370200 | 0.12575400  | 2.85910700  |
| H | -1.18600000 | 1.08883400  | 3.04566100  |
| H | -2.24867800 | -0.14124400 | 3.74187500  |
| H | -0.86355500 | -0.62249700 | 2.77191700  |
| C | -6.33619700 | -2.07386700 | 1.59247200  |
| H | -6.49993400 | -1.41891200 | 2.45636200  |
| H | -7.27659600 | -2.57916900 | 1.36708900  |
| H | -5.60504600 | -2.83149400 | 1.89521600  |
| O | -4.92588700 | 0.21913900  | -1.79763200 |
| O | -6.75211800 | -0.35277200 | -2.95050700 |
| H | 7.68079000  | 0.38096100  | 0.26807800  |
| H | 3.95495500  | -0.01213000 | 0.01111200  |
| H | 2.90394600  | 1.30614800  | -0.28034700 |
| C | 3.45065200  | -1.44317300 | 2.05542800  |
| H | 3.98394500  | -0.74600700 | 2.70500900  |
| H | 2.42147500  | -1.09281900 | 1.96205700  |
| H | 3.45043100  | -2.43576100 | 2.52991900  |

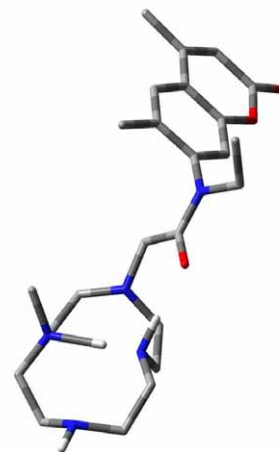

<sup>1</sup> Structure is more stable and has been optimized with an extraannular N7-H.



4.[2424].8.eie

|   |             |             |             |
|---|-------------|-------------|-------------|
| C | 4.03522900  | -0.27725000 | 0.88373900  |
| N | 3.60614900  | -0.68840600 | -0.44375800 |
| C | 4.40999900  | -0.19316400 | -1.55691600 |
| C | 2.89558700  | 3.12865700  | -0.84218900 |
| N | 3.00098600  | 1.83854000  | -1.50345400 |
| C | 4.36378000  | 1.34342700  | -1.63893500 |
| C | 3.08672100  | -0.77504600 | -1.98706800 |
| N | 1.66572500  | -0.45225000 | 1.80132200  |
| C | 1.19887500  | 0.74763600  | 2.49250100  |
| C | 1.47929000  | 3.36243900  | -0.30237700 |
| N | 0.99638900  | 2.23744000  | 0.50583900  |
| C | 1.59267400  | 2.07946000  | 1.82659600  |
| H | 5.02638900  | 1.76013500  | -0.85567400 |
| H | 4.80751900  | 1.65453300  | -2.59584800 |
| H | 3.98891700  | -0.62012300 | -2.47449200 |
| H | 5.47295700  | -0.49809300 | -1.51267700 |
| H | 1.55580400  | 0.78110900  | 3.54067800  |
| H | 0.10422900  | 0.70866500  | 2.54227700  |
| H | 1.31551000  | 2.89127200  | 2.52693300  |
| H | 2.68068800  | 2.13025500  | 1.72972900  |
| H | 3.44781800  | -0.37517200 | 2.95105700  |
| H | 3.18084400  | -1.86255900 | 2.03969400  |
| H | 4.08246900  | 0.81508200  | 0.90412300  |
| H | 5.05356000  | -0.62926300 | 1.14591700  |
| H | 0.78550200  | 3.45984600  | -1.14317100 |
| H | 1.46923700  | 4.32384400  | 0.24264500  |
| H | 3.62546800  | 3.22946000  | -0.01129700 |
| H | 3.13340900  | 3.94492400  | -1.53947400 |
| C | 0.78865100  | -1.61902100 | 1.90979000  |
| H | -0.23786200 | -1.28144800 | 2.04957100  |
| H | 1.04231400  | -2.27386600 | 2.76190800  |
| C | 0.92076900  | -2.48739200 | 0.65055000  |
| O | 1.93469600  | -3.16094000 | 0.46690600  |
| N | -0.11576800 | -2.50765900 | -0.26109000 |
| C | 0.10660300  | -3.24139800 | -1.52538600 |
| H | 0.78389800  | -4.06390700 | -1.29313400 |
| H | -0.84988000 | -3.66160000 | -1.84729800 |
| C | 0.69553600  | -2.34988700 | -2.61988300 |
| H | 0.00660500  | -1.54552600 | -2.89450800 |
| H | 1.62894200  | -1.89389700 | -2.28084600 |
| H | 0.89992100  | -2.94271000 | -3.51759400 |
| C | -1.15365000 | -0.29991700 | -0.30246500 |
| C | -2.29181800 | 0.50242800  | -0.24290300 |
| C | -1.28305600 | -1.68331200 | -0.18293800 |
| C | -3.57711300 | -0.04962300 | -0.10452800 |
| C | -2.55722400 | -2.28196900 | -0.01282700 |
| C | -3.15177200 | 2.76647100  | -0.28119200 |
| C | -4.71522300 | 0.85760600  | -0.07600400 |
| C | -3.67206700 | -1.44823300 | 0.01204400  |
| C | -4.48398300 | 2.19178500  | -0.17036500 |
| H | -4.65087700 | -1.89828600 | 0.14414900  |
| H | -5.29285800 | 2.91320400  | -0.15464800 |
| H | -0.17605500 | 0.16288400  | -0.40406800 |
| C | -2.72006600 | -3.77238500 | 0.16386200  |
| H | -1.89790000 | -4.19537000 | 0.74696900  |
| H | -3.65933600 | -3.99997300 | 0.67460700  |
| H | -2.73614900 | -4.30108800 | -0.79680700 |
| C | -6.11239800 | 0.31613600  | 0.05437300  |
| H | -6.23036600 | -0.24762700 | 0.98672800  |
| H | -6.84712100 | 1.12341500  | 0.04828200  |
| H | -6.34701000 | -0.36880100 | -0.76806900 |
| O | -2.09539900 | 1.85406000  | -0.32386000 |
| O | -2.87809200 | 3.94240300  | -0.33239300 |
| H | 2.47006600  | 1.15998300  | -0.95724000 |
| H | 3.48049700  | -1.69544000 | -0.48154200 |
| H | -0.01322800 | 2.31360700  | 0.58618700  |

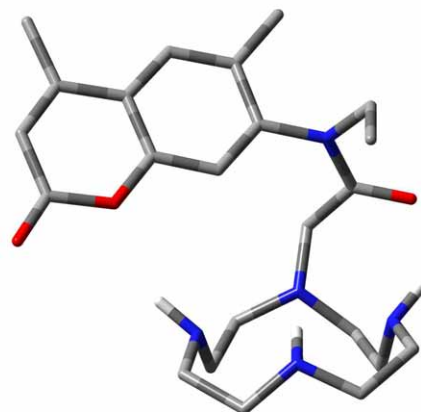

**[4.[2424].8.eie.N7-CH<sub>3</sub>]<sup>+</sup>**

|   |             |             |             |
|---|-------------|-------------|-------------|
| C | 3.46325000  | -1.56843200 | 0.38966800  |
| N | 2.77323700  | -1.20738800 | -0.85313700 |
| C | 3.62925600  | -0.71509300 | -1.92404000 |
| C | 3.52094500  | 2.51235300  | 0.06819200  |
| N | 3.06716600  | 1.54426700  | -0.99547000 |
| C | 4.16262800  | 0.68679200  | -1.57671400 |
| C | 2.51377900  | -2.20609600 | 1.41735600  |
| N | 1.25370100  | -1.47814900 | 1.63489100  |
| C | 1.29172000  | -0.52948500 | 2.75111000  |
| C | 2.35231700  | 2.74408000  | 1.04907400  |
| N | 1.70404300  | 1.46461100  | 1.32778000  |
| C | 2.13633700  | 0.73116000  | 2.51916800  |
| H | 4.94941500  | 0.61761000  | -0.82437500 |
| H | 4.57982400  | 1.18898400  | -2.45229400 |
| H | 3.03843200  | -0.67837800 | -2.84480600 |
| H | 4.51031100  | -1.34513700 | -2.13481300 |
| H | 1.65061000  | -1.00018900 | 3.68543300  |
| H | 0.26298700  | -0.20350600 | 2.94611000  |
| H | 2.06154400  | 1.34434300  | 3.43316400  |
| H | 3.19589700  | 0.47156200  | 2.41656800  |
| H | 3.07067000  | -2.33302000 | 2.36134700  |
| H | 2.26454300  | -3.20667400 | 1.05991600  |
| H | 3.91980900  | -0.66325100 | 0.80538200  |
| H | 4.29218400  | -2.27692000 | 0.21778400  |
| H | 1.61703000  | 3.41998100  | 0.60397600  |
| H | 2.75270500  | 3.24099000  | 1.94425300  |
| H | 4.36563600  | 2.04557600  | 0.57932700  |
| H | 3.86593500  | 3.43577300  | -0.40225400 |
| C | 0.08617000  | -2.37171500 | 1.72051500  |
| H | -0.76848000 | -1.78907600 | 2.06511800  |
| H | 0.23368800  | -3.19615900 | 2.43947700  |
| C | -0.23606200 | -3.05174100 | 0.38175300  |
| O | 0.50275800  | -3.92321800 | -0.07252400 |
| N | -1.42478600 | -2.72640400 | -0.24830700 |
| C | -1.78274800 | -3.52278500 | -1.44838600 |
| H | -1.50840300 | -4.55627800 | -1.23251000 |
| H | -2.86743600 | -3.47484000 | -1.55955100 |
| C | -1.09517900 | -3.04845000 | -2.72859200 |
| H | -1.32633600 | -2.00058500 | -2.94444200 |
| H | -0.01219600 | -3.16839400 | -2.64827800 |
| H | -1.43890200 | -3.64927400 | -3.57610500 |
| C | -1.20646900 | -0.31670700 | -0.29788500 |
| C | -1.75444300 | 0.95604100  | -0.22015700 |
| C | -2.02179500 | -1.43465300 | -0.11578400 |
| C | -3.12340600 | 1.16286500  | 0.00829700  |
| C | -3.40464300 | -1.27964200 | 0.15656600  |
| C | -1.30694800 | 3.32881500  | -0.37190600 |
| C | -3.61159100 | 2.53506400  | 0.03485900  |
| C | -3.91827700 | 0.01671300  | 0.20151800  |
| C | -2.72252700 | 3.54882800  | -0.15832200 |
| H | -4.97594500 | 0.14304100  | 0.40871000  |
| H | -3.03332900 | 4.58691800  | -0.15354000 |
| H | -0.14397200 | -0.43263300 | -0.47861200 |
| C | -4.30760100 | -2.46081300 | 0.41788500  |
| H | -3.75722600 | -3.28915600 | 0.87046000  |
| H | -5.12211700 | -2.18103600 | 1.09055400  |
| H | -4.76663100 | -2.83583900 | -0.50447900 |
| C | -5.06981400 | 2.81396000  | 0.26525800  |
| H | -5.39762400 | 2.41167300  | 1.23022400  |
| H | -5.27244200 | 3.88595300  | 0.25523100  |
| H | -5.68484500 | 2.34024000  | -0.50781900 |
| O | -0.88391900 | 2.00233000  | -0.38644900 |
| O | -0.44335600 | 4.17091000  | -0.52916100 |
| H | 2.43379500  | 0.89190500  | -0.45686300 |
| H | 2.20816100  | -1.99003700 | -1.17147100 |
| H | 0.69625100  | 1.56915400  | 1.31250200  |
| C | 2.23457600  | 2.20559300  | -2.05166500 |
| H | 2.86650100  | 2.89316100  | -2.61631100 |
| H | 1.83464900  | 1.43755200  | -2.71357500 |
| H | 1.41108100  | 2.74730400  | -1.58526700 |

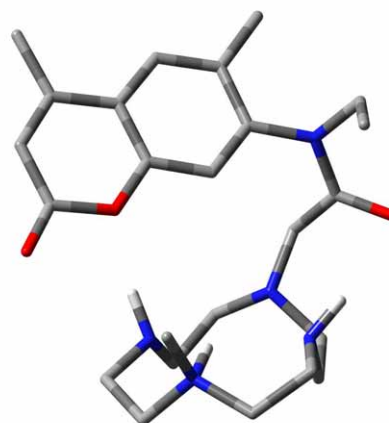

4.[2424].9.iie

|   |             |             |             |
|---|-------------|-------------|-------------|
| C | 4.19968700  | -0.37422300 | 1.46715600  |
| N | 4.10080200  | -0.69900100 | 0.05078100  |
| C | 5.25875800  | -0.32045100 | -0.75762500 |
| C | 3.44288600  | 2.88342400  | -1.03826900 |
| N | 3.96264200  | 1.60846800  | -1.52908200 |
| C | 5.26884500  | 1.19946300  | -1.02050800 |
| C | 2.99417100  | -0.87615000 | 2.27683500  |
| N | 1.67704200  | -0.42511400 | 1.82402400  |
| C | 1.21876300  | 0.87483700  | 2.31589000  |
| C | 1.90964200  | 2.81612400  | -0.89299200 |
| N | 1.39113100  | 1.82550800  | 0.05872900  |
| C | 1.71124600  | 2.05858300  | 1.46352800  |
| H | 5.52660500  | 1.72887600  | -0.08511900 |
| H | 6.07312800  | 1.43131200  | -1.73267500 |
| H | 5.17334500  | -0.84333100 | -1.71665400 |
| H | 6.22399000  | -0.61378100 | -0.30719500 |
| H | 1.52520000  | 1.03943000  | 3.36431600  |
| H | 0.12539800  | 0.88223600  | 2.29255900  |
| H | 1.19563000  | 2.96645600  | 1.80445000  |
| H | 2.78538100  | 2.22524800  | 1.64854100  |
| H | 3.15876500  | -0.59253800 | 3.33258300  |
| H | 3.00040800  | -1.96817500 | 2.23118500  |
| H | 4.29749000  | 0.71146200  | 1.57324600  |
| H | 5.10434500  | -0.80551200 | 1.94070800  |
| H | 1.48001700  | 2.58433800  | -1.87501500 |
| H | 1.52714000  | 3.80224200  | -0.60482000 |
| H | 3.89310500  | 3.16244900  | -0.06750200 |
| H | 3.69205900  | 3.69894600  | -1.73257100 |
| C | 0.67618800  | -1.48712100 | 1.72502200  |
| H | -0.31878800 | -1.06104500 | 1.84443000  |
| H | 0.80117200  | -2.25715300 | 2.50328400  |
| C | 0.82958200  | -2.19064900 | 0.37046000  |
| O | 1.85207400  | -2.82970200 | 0.11799700  |
| N | -0.17329700 | -2.05945000 | -0.56280800 |
| C | 0.07389300  | -2.61886600 | -1.90949300 |
| H | 0.64929200  | -3.53760700 | -1.77992300 |
| H | -0.89587900 | -2.87354500 | -2.34524500 |
| C | 0.82646000  | -1.64221200 | -2.81361000 |
| H | 0.26186900  | -0.71525200 | -2.95280900 |
| H | 1.79969200  | -1.39666100 | -2.38145200 |
| H | 0.99131700  | -2.09071800 | -3.79892900 |
| C | -1.52295200 | -0.01752200 | -0.38748300 |
| C | -2.76604700 | 0.59764500  | -0.22193200 |
| C | -1.43497800 | -1.40820100 | -0.34164500 |
| C | -3.93616900 | -0.15568000 | -0.02060000 |
| C | -2.58809700 | -2.20379400 | -0.12212100 |
| C | -3.96348900 | 2.69190400  | -0.13124800 |
| C | -5.19521600 | 0.55926100  | 0.13292000  |
| C | -3.81009300 | -1.55595600 | 0.03008300  |
| C | -5.17841900 | 1.91414700  | 0.07403000  |
| H | -4.69739100 | -2.15682900 | 0.20194100  |
| H | -6.08367200 | 2.50113300  | 0.17990700  |
| H | -0.64102900 | 0.60836800  | -0.50587800 |
| C | -2.50306600 | -3.70865600 | -0.03468800 |
| H | -1.70640300 | -4.02778700 | 0.64412500  |
| H | -3.44590100 | -4.12801400 | 0.32511800  |
| H | -2.28863700 | -4.16575300 | -1.00731500 |
| C | -6.47637500 | -0.19870300 | 0.34930200  |
| H | -6.42508000 | -0.80715000 | 1.25937100  |
| H | -7.32345700 | 0.48364900  | 0.44173500  |
| H | -6.67530800 | -0.88198000 | -0.48402300 |
| O | -2.78516500 | 1.96066300  | -0.27214100 |
| O | -3.89329100 | 3.89696000  | -0.18748800 |
| H | 3.33577800  | 0.87427500  | -1.20558200 |
| H | 1.73803500  | 0.89334200  | -0.16416100 |
| H | 3.83387900  | -1.67040100 | -0.07714800 |

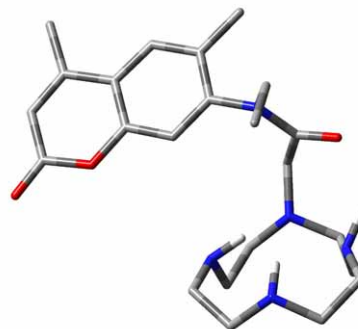

[4.[2424].9.ii.e.N4-CH<sub>3</sub>]<sup>+,2</sup>

|   |             |             |             |
|---|-------------|-------------|-------------|
| C | -3.68821200 | -1.02184700 | -1.58397400 |
| N | -3.94609400 | -0.89681300 | -0.13634300 |
| C | -5.13602400 | -1.62301200 | 0.34354000  |
| C | -6.30554500 | 1.57600400  | -0.21126400 |
| N | -6.58338200 | 0.39226400  | 0.59412700  |
| C | -6.45285200 | -0.93080600 | -0.02166700 |
| C | -2.20193100 | -0.74645500 | -1.89456200 |
| N | -1.58476000 | 0.26206600  | -1.02512500 |
| C | -1.78915300 | 1.65165600  | -1.40238200 |
| C | -5.15916000 | 2.41450800  | 0.36975300  |
| N | -3.79834400 | 1.78158500  | 0.19248600  |
| C | -3.20895200 | 2.18345600  | -1.13447700 |
| H | -6.56873300 | -0.88150000 | -1.11584700 |
| H | -7.26581700 | -1.56902100 | 0.33899700  |
| H | -5.06604500 | -1.67807600 | 1.43377800  |
| H | -5.14872600 | -2.65306900 | -0.04503000 |
| H | -1.58259000 | 1.85208800  | -2.46969200 |
| H | -1.08026000 | 2.26285000  | -0.83761600 |
| H | -3.18685300 | 3.27775800  | -1.17942400 |
| H | -3.91139200 | 1.84130300  | -1.89643900 |
| H | -2.09306300 | -0.48968500 | -2.96151800 |
| H | -1.65757200 | -1.67954500 | -1.73779600 |
| H | -4.34384900 | -0.33514500 | -2.13212800 |
| H | -3.93338700 | -2.02918200 | -1.95070800 |
| H | -5.32861600 | 2.52673100  | 1.44164800  |
| H | -5.12615100 | 3.41317400  | -0.07796400 |
| H | -6.09604800 | 1.30092000  | -1.25429400 |
| H | -7.17856000 | 2.23972600  | -0.25064400 |
| C | -0.22273200 | -0.07472100 | -0.63435200 |
| H | 0.25375300  | 0.80577100  | -0.19347800 |
| H | 0.41858300  | -0.36232700 | -1.48354200 |
| C | -0.21262400 | -1.20124000 | 0.42250800  |
| O | -1.25976700 | -1.62638200 | 0.92001000  |
| N | 1.00315600  | -1.71364800 | 0.76241100  |
| C | 1.05813400  | -2.79214800 | 1.77768400  |
| H | 0.18310700  | -3.42549900 | 1.62116800  |
| H | 1.95334200  | -3.38224800 | 1.56668200  |
| C | 1.08791700  | -2.26539700 | 3.21170000  |
| H | 1.95838200  | -1.62586000 | 3.38495300  |
| H | 0.18032700  | -1.69748300 | 3.43182400  |
| H | 1.14275800  | -3.10351200 | 3.91303400  |
| C | 2.71219600  | 0.02144200  | 0.88948400  |
| C | 3.92775500  | 0.57104300  | 0.48138800  |
| C | 2.24786400  | -1.15475200 | 0.30391100  |
| C | 4.70945100  | -0.05952400 | -0.50350600 |
| C | 2.99787600  | -1.81538800 | -0.69623400 |
| C | 5.51250600  | 2.37118600  | 0.75958900  |
| C | 5.97970900  | 0.55910200  | -0.86843500 |
| C | 4.21494700  | -1.24742000 | -1.07098300 |
| C | 6.33389300  | 1.71154200  | -0.24771000 |
| H | 4.80211900  | -1.74316800 | -1.83686200 |
| H | 7.26562700  | 2.21697700  | -0.47453400 |
| H | 2.14815100  | 0.51663600  | 1.67202600  |
| C | 2.51024800  | -3.09023500 | -1.34069400 |
| H | 1.45687100  | -3.02211100 | -1.62953000 |
| H | 3.09304000  | -3.31977300 | -2.23555500 |
| H | 2.59777300  | -3.94844900 | -0.66448900 |
| C | 6.86381500  | -0.07923400 | -1.90352900 |
| H | 6.34877400  | -0.16061000 | -2.86747800 |
| H | 7.77424100  | 0.50354300  | -2.05235100 |
| H | 7.15217600  | -1.09298600 | -1.60372700 |
| O | 4.30722300  | 1.72849800  | 1.08324400  |
| O | 5.76525000  | 3.40204700  | 1.32921500  |
| H | -7.47729300 | 0.48159700  | 1.05803700  |
| H | -3.91642300 | 0.65877400  | 0.15329200  |
| H | -3.10716100 | -1.22930900 | 0.35444200  |
| C | -2.89995100 | 2.08720200  | 1.34280400  |
| H | -3.40763300 | 1.79334400  | 2.26187500  |
| H | -1.98964400 | 1.49994300  | 1.24051500  |
| H | -2.67393600 | 3.15617000  | 1.37417500  |

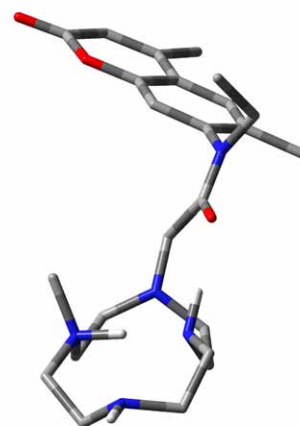

<sup>2</sup> Structure is more stable and has been optimized with an extraannular N7-H.

4.[3333].1.iei

|   |             |             |             |
|---|-------------|-------------|-------------|
| C | 5.22002800  | -1.99615700 | -0.50438800 |
| C | 6.09475900  | -0.75148400 | -0.25508700 |
| N | 5.54862400  | 0.05905400  | 0.83142000  |
| C | 5.87756400  | 1.48600300  | 0.80262200  |
| C | 4.91037400  | 2.25484700  | -0.10385400 |
| N | 3.56075100  | 2.17923900  | 0.43561600  |
| C | 2.49966700  | 2.64757900  | -0.44053500 |
| C | 2.17092700  | 1.76085500  | -1.66351000 |
| N | 1.79709300  | 0.39864500  | -1.29267800 |
| C | 2.14854500  | -0.64639800 | -2.25582200 |
| C | 3.60687400  | -1.09545900 | -2.12883100 |
| N | 3.82489700  | -1.73057600 | -0.83630600 |
| H | 1.51735700  | -1.51922700 | -2.05854100 |
| H | 1.94965800  | -0.32783000 | -3.29469700 |
| H | 5.76915800  | 1.87785900  | 1.81954900  |
| H | 6.91574900  | 1.68238600  | 0.48090800  |
| H | 5.23645200  | -2.62314900 | 0.39783400  |
| H | 5.67250300  | -2.59641500 | -1.30575400 |
| H | 2.74944300  | 3.65311900  | -0.80593200 |
| H | 1.59102300  | 2.76727700  | 0.16500500  |
| H | 3.42590400  | -1.13381200 | -0.11092100 |
| H | 3.36437300  | 1.21773600  | 0.71294000  |
| H | 1.38483800  | 2.25869200  | -2.26583100 |
| H | 3.82036500  | -1.82030600 | -2.92813800 |
| H | 7.14069100  | -1.06480000 | -0.07930800 |
| H | 5.22562200  | 3.30754700  | -0.14717000 |
| H | 3.05347500  | 1.69462600  | -2.30662700 |
| H | 5.00874200  | 1.86507900  | -1.13576200 |
| H | 6.11362400  | -0.13413800 | -1.15926100 |
| H | 4.26137500  | -0.22521400 | -2.32394100 |
| C | 0.51795200  | 0.25006300  | -0.63859700 |
| H | 0.03320300  | 1.22798300  | -0.52357900 |
| H | -0.18442500 | -0.35159400 | -1.23283800 |
| C | 0.64633600  | -0.36150200 | 0.77461500  |
| O | 1.71436600  | -0.40485600 | 1.37470900  |
| N | -0.50636400 | -0.86430800 | 1.34372600  |
| C | -0.41764800 | -1.42733300 | 2.70635800  |
| H | -1.21252600 | -2.17282700 | 2.80504500  |
| H | 0.54515700  | -1.93694800 | 2.77891800  |
| C | -0.53663400 | -0.36886700 | 3.80329700  |
| H | 0.27452400  | 0.35817700  | 3.71606100  |
| H | -1.49384300 | 0.15904200  | 3.74768000  |
| H | -0.46905200 | -0.84057300 | 4.78925100  |
| C | -1.80367700 | -0.75314600 | 0.74648200  |
| C | -2.49509500 | 0.45383900  | 0.83080800  |
| C | -2.38683400 | -1.87606600 | 0.10884200  |
| C | -3.77043300 | 0.56883900  | 0.27700900  |
| H | -2.05440500 | 1.31147700  | 1.32603800  |
| C | -3.66245100 | -1.73090600 | -0.42921000 |
| C | -4.38286000 | -0.52348700 | -0.36227600 |
| H | -4.11478100 | -2.58329900 | -0.92575900 |
| C | -5.66262600 | 2.01437300  | -0.11824500 |
| C | -5.71634900 | -0.33148600 | -0.91520000 |
| C | -6.29992400 | 0.88610000  | -0.78378200 |
| H | -7.29073700 | 1.08847300  | -1.17424100 |
| C | -1.64412700 | -3.18502600 | -0.00013400 |
| H | -0.63396900 | -3.04230400 | -0.39596100 |
| H | -1.53179500 | -3.67165700 | 0.97527700  |
| H | -2.17499700 | -3.87859700 | -0.65681800 |
| C | -6.41875600 | -1.46448700 | -1.61159600 |
| H | -5.83727800 | -1.82023900 | -2.46959200 |
| H | -6.55342800 | -2.31775900 | -0.93725200 |
| H | -7.40183200 | -1.15349600 | -1.96995100 |
| O | -4.38390100 | 1.78034300  | 0.39295000  |
| O | -6.13542900 | 3.11602600  | 0.02708800  |
| H | 5.79084900  | -0.34593300 | 1.72914200  |

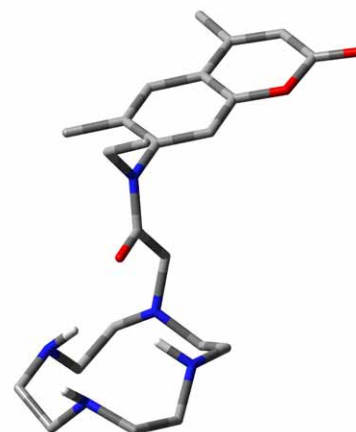

[4.3333].1.1ei.N10-CH<sub>3</sub><sup>+</sup>

|   |             |             |             |
|---|-------------|-------------|-------------|
| C | -3.93863000 | 2.83816900  | 0.50526000  |
| C | -5.19702700 | 1.96909700  | 0.32737100  |
| N | -4.97235900 | 0.61535700  | 0.86159400  |
| C | -5.80819800 | -0.43575100 | 0.29435400  |
| C | -5.10539100 | -1.11090600 | -0.89104400 |
| N | -3.79287500 | -1.74781100 | -0.50956400 |
| C | -2.93640900 | -2.10778300 | -1.70213500 |
| C | -2.33501500 | -0.90150700 | -2.43298800 |
| N | -1.62533800 | 0.01465400  | -1.55496200 |
| C | -1.55091600 | 1.40516800  | -2.04785900 |
| C | -2.72829400 | 2.24616400  | -1.55676600 |
| N | -2.73051900 | 2.28162100  | -0.09924700 |
| H | -0.63140700 | 1.85369200  | -1.66400300 |
| H | -1.49380300 | 1.43753700  | -3.14581900 |
| H | -6.04476900 | -1.17342600 | 1.06672000  |
| H | -6.77872800 | -0.07264700 | -0.07843800 |
| H | -3.74842700 | 2.97747000  | 1.57690300  |
| H | -4.12797000 | 3.83551700  | 0.09200100  |
| H | -3.54245100 | -2.71016700 | -2.38485900 |
| H | -2.14111200 | -2.74396100 | -1.30922700 |
| H | -2.63665400 | 1.32539700  | 0.23871600  |
| H | -3.20621300 | -1.07690600 | 0.04877500  |
| H | -1.69862600 | -1.32227200 | -3.23399600 |
| H | -2.62081900 | 3.26632600  | -1.94650200 |
| H | -6.06542000 | 2.46285300  | 0.79081500  |
| H | -5.73036900 | -1.89076000 | -1.33707200 |
| H | -3.12367300 | -0.34004500 | -2.94095100 |
| H | -4.88608500 | -0.36470800 | -1.65568800 |
| H | -5.43149000 | 1.87498200  | -0.73855300 |
| H | -3.66119700 | 1.84854700  | -2.00230600 |
| C | -0.41154000 | -0.49482600 | -0.92598400 |
| H | -0.15311600 | -1.49136700 | -1.31212800 |
| H | 0.44609400  | 0.14038400  | -1.15524300 |
| C | -0.59808900 | -0.63805900 | 0.59663500  |
| O | -1.70025900 | -0.99629300 | 1.05379700  |
| N | 0.45126600  | -0.38062800 | 1.40889400  |
| C | 0.28732100  | -0.55540400 | 2.87259100  |
| H | 0.96453800  | 0.15378200  | 3.35394100  |
| H | -0.73822200 | -0.27464700 | 3.11809100  |
| C | 0.58390100  | -1.98025600 | 3.33727700  |
| H | -0.10309700 | -2.69110100 | 2.87028600  |
| H | 1.61036200  | -2.27359100 | 3.09945800  |
| H | 0.45822800  | -2.04916600 | 4.42197000  |
| C | 1.74952300  | 0.01646900  | 0.92252700  |
| C | 2.62739000  | -0.96769100 | 0.47702900  |
| C | 2.11660100  | 1.38161700  | 0.93543700  |
| C | 3.89766900  | -0.60897000 | 0.02385800  |
| H | 2.34468100  | -2.01427300 | 0.47669400  |
| C | 3.39538700  | 1.70290500  | 0.48072500  |
| C | 4.30865600  | 0.73654600  | 0.02171600  |
| H | 3.69441800  | 2.74579600  | 0.48015700  |
| C | 5.99609300  | -1.37918100 | -0.88779300 |
| C | 5.65319100  | 1.04006100  | -0.45812700 |
| C | 6.43009000  | 0.01252100  | -0.88118400 |
| H | 7.43747700  | 0.17433400  | -1.24729400 |
| C | 1.17181800  | 2.45784700  | 1.41685900  |
| H | 0.17894400  | 2.38394000  | 0.95976500  |
| H | 1.02449500  | 2.40960200  | 2.50214000  |
| H | 1.57283900  | 3.44816200  | 1.18956700  |
| C | 6.15096300  | 2.45858700  | -0.47456800 |
| H | 5.51713500  | 3.09292500  | -1.10457000 |
| H | 6.14327400  | 2.89070500  | 0.53243800  |
| H | 7.17098600  | 2.50934300  | -0.85879900 |
| O | 4.69763000  | -1.61711600 | -0.40830000 |
| O | 6.63536000  | -2.32853300 | -1.26169600 |
| H | -5.04973500 | 0.62489600  | 1.87313200  |
| C | -3.97418100 | -2.95289000 | 0.36133600  |
| H | -4.59469300 | -2.69636000 | 1.21724100  |
| H | -4.44483000 | -3.74951200 | -0.21736600 |
| H | -2.99311300 | -3.25966700 | 0.71943300  |

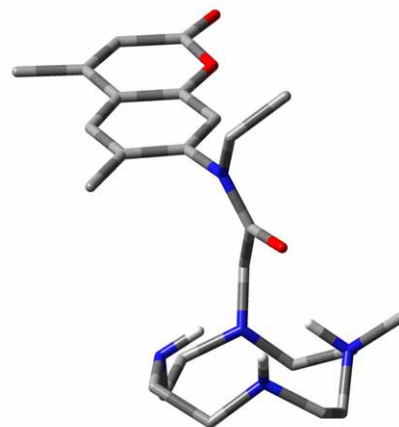

[4.[3333].1.1ei.N4-CH<sub>3</sub>]<sup>+</sup>

|   |             |             |             |
|---|-------------|-------------|-------------|
| C | 5.49046500  | -0.92068800 | 0.19048400  |
| C | 5.69144100  | 0.58100200  | 0.37051600  |
| N | 4.66106000  | 1.16089800  | 1.21921700  |
| C | 4.58845900  | 2.63567400  | 1.16076300  |
| C | 3.74060300  | 3.09509800  | -0.02524900 |
| N | 2.37185600  | 2.63069800  | 0.15426100  |
| C | 1.52748700  | 2.67381900  | -1.02954100 |
| C | 1.78601200  | 1.55645700  | -2.06342300 |
| N | 1.77827800  | 0.21374000  | -1.45561300 |
| C | 2.49620700  | -0.79324200 | -2.23010800 |
| C | 3.97646100  | -0.87650600 | -1.83397800 |
| N | 4.15592100  | -1.31737300 | -0.40099000 |
| H | 2.01689300  | -1.76815900 | -2.09777100 |
| H | 2.46473100  | -0.59049200 | -3.31239100 |
| H | 4.10427300  | 2.97719200  | 2.07986000  |
| H | 5.58521500  | 3.10089100  | 1.11572500  |
| H | 5.54665900  | -1.42347000 | 1.16008200  |
| H | 6.26752500  | -1.34403100 | -0.45300700 |
| H | 1.65192600  | 3.63975200  | -1.53192500 |
| H | 0.47813600  | 2.64647200  | -0.70943100 |
| H | 3.36861800  | -0.87946100 | 0.14381100  |
| H | 2.41257600  | 1.67279400  | 0.49725300  |
| H | 1.06014800  | 1.63900100  | -2.89124800 |
| H | 4.52534400  | -1.57834800 | -2.46907800 |
| H | 6.71916000  | 0.71357200  | 0.75195300  |
| H | 3.75558000  | 4.19137000  | -0.06706200 |
| H | 2.77738900  | 1.70239500  | -2.50563900 |
| H | 4.21381600  | 2.75018000  | -0.96676300 |
| H | 5.67212500  | 1.08957300  | -0.59795100 |
| H | 4.43521300  | 0.10691200  | -1.93315200 |
| C | 0.49096100  | -0.21814800 | -0.93633500 |
| H | -0.13623000 | 0.65583100  | -0.75464100 |
| H | -0.07955300 | -0.83938300 | -1.64669300 |
| C | 0.63583000  | -0.98633500 | 0.39071900  |
| O | 1.75250200  | -1.23139700 | 0.87859200  |
| N | -0.50297200 | -1.40870200 | 0.99254800  |
| C | -0.40855500 | -2.14724100 | 2.27509100  |
| H | -1.28203200 | -2.80181000 | 2.32848800  |
| H | 0.48549600  | -2.77124200 | 2.22365200  |
| C | -0.35021900 | -1.22662200 | 3.49316800  |
| H | 0.52987900  | -0.58003500 | 3.44743600  |
| H | -1.24440700 | -0.60125800 | 3.56451800  |
| H | -0.28725700 | -1.82608200 | 4.40641400  |
| C | -1.81925200 | -1.06281700 | 0.51440200  |
| C | -2.33999200 | 0.19031600  | 0.82860000  |
| C | -2.57410800 | -2.00624000 | -0.21771500 |
| C | -3.62603900 | 0.53298700  | 0.40750300  |
| H | -1.76583100 | 0.90900000  | 1.40282100  |
| C | -3.85816800 | -1.63541900 | -0.61516100 |
| C | -4.41413700 | -0.37834100 | -0.31947300 |
| H | -4.45030700 | -2.34926400 | -1.17808200 |
| C | -5.34293900 | 2.22972000  | 0.37358200  |
| C | -5.75440600 | 0.04034000  | -0.71804700 |
| C | -6.16588900 | 1.28471200  | -0.37184700 |
| H | -7.15009700 | 1.65340000  | -0.63735100 |
| C | -2.02276100 | -3.36886300 | -0.56214200 |
| H | -1.04458400 | -3.30186800 | -1.05054600 |
| H | -1.89052700 | -3.99421300 | 0.32791800  |
| H | -2.69767400 | -3.89895000 | -1.23752900 |
| C | -6.64372600 | -0.89610600 | -1.48764600 |
| H | -6.18161500 | -1.18968500 | -2.43699800 |
| H | -6.83230300 | -1.81478200 | -0.92076400 |
| H | -7.60510200 | -0.42903300 | -1.70736900 |
| O | -4.06512300 | 1.77395200  | 0.73808400  |
| O | -5.65064000 | 3.34722400  | 0.69860500  |
| H | 4.80503500  | 0.86818000  | 2.18178900  |
| C | 3.97206500  | -2.79768600 | -0.25560100 |
| H | 4.80589200  | -3.30926600 | -0.73937100 |
| H | 3.93752200  | -3.04102500 | 0.80536100  |
| H | 3.03065000  | -3.09295600 | -0.71189200 |

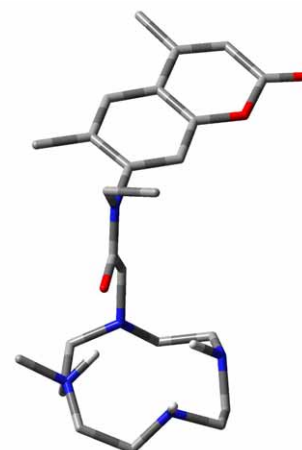

4.[3333].2.iie

|   |             |             |             |
|---|-------------|-------------|-------------|
| C | -3.62073900 | 2.67806100  | 0.87187800  |
| C | -5.03573700 | 2.23322600  | 0.46349100  |
| N | -5.38016200 | 0.95324100  | 1.09276700  |
| C | -6.26661600 | 0.09109500  | 0.31395700  |
| C | -5.62126200 | -0.55113800 | -0.93047900 |
| N | -4.38158800 | -1.22828500 | -0.56156200 |
| C | -3.59216700 | -1.76150400 | -1.67165500 |
| C | -2.67000600 | -0.71121900 | -2.30687100 |
| N | -1.62009200 | -0.21971200 | -1.41389400 |
| C | -1.22395000 | 1.17191500  | -1.65407700 |
| C | -2.26834600 | 2.16324400  | -1.12920700 |
| N | -2.51275200 | 1.91570400  | 0.28709600  |
| H | -0.29038000 | 1.35244400  | -1.11387700 |
| H | -1.02848400 | 1.37859200  | -2.72280300 |
| H | -6.62198800 | -0.71107900 | 0.97659500  |
| H | -7.15570400 | 0.65914500  | 0.01517700  |
| H | -3.54596400 | 2.61007100  | 1.96488700  |
| H | -3.48132700 | 3.73397500  | 0.61107600  |
| H | -4.22488400 | -2.18154700 | -2.47569600 |
| H | -2.97773700 | -2.57291100 | -1.27528300 |
| H | -2.67014400 | 0.91172200  | 0.38333700  |
| H | -2.23922500 | -1.14446200 | -3.23030800 |
| H | -1.87702800 | 3.18163000  | -1.25825200 |
| H | -5.75769300 | 2.99708300  | 0.78669000  |
| H | -6.35734600 | -1.21608800 | -1.42215100 |
| H | -3.27049000 | 0.14605400  | -2.62559900 |
| H | -5.37797000 | 0.22737000  | -1.66361900 |
| H | -5.09543500 | 2.20057500  | -0.63757500 |
| H | -3.17925400 | 2.10568900  | -1.75148500 |
| C | -0.50544400 | -1.14994500 | -1.21711900 |
| H | -0.57252800 | -1.98717800 | -1.92432500 |
| H | 0.44521100  | -0.64874700 | -1.40946600 |
| C | -0.53957300 | -1.78438500 | 0.18553300  |
| O | -1.41752800 | -2.58975500 | 0.48532900  |
| N | 0.41228500  | -1.40772300 | 1.11215300  |
| C | 0.34171200  | -2.04047300 | 2.44691600  |
| H | 0.84083600  | -1.37207000 | 3.15315600  |
| H | -0.71374100 | -2.10616500 | 2.71763000  |
| C | 0.98412000  | -3.42791600 | 2.48452500  |
| H | 0.46670700  | -4.10246200 | 1.79853000  |
| H | 2.04283200  | -3.38387700 | 2.21033100  |
| H | 0.91471700  | -3.84570500 | 3.49438600  |
| C | 1.56764700  | -0.61012700 | 0.82365600  |
| C | 2.61040800  | -1.17127200 | 0.08633400  |
| C | 1.66410600  | 0.71322500  | 1.32302500  |
| C | 3.75537600  | -0.42504400 | -0.18903000 |
| H | 2.54155300  | -2.18841400 | -0.28222000 |
| C | 2.82833600  | 1.42529200  | 1.03999800  |
| C | 3.89004700  | 0.89087800  | 0.28668800  |
| H | 2.91209300  | 2.44082100  | 1.41323000  |
| C | 5.92144300  | -0.39110600 | -1.25295700 |
| C | 5.11647000  | 1.60870200  | -0.03072400 |
| C | 6.06491300  | 0.97337900  | -0.76406100 |
| H | 6.99797200  | 1.45653000  | -1.03057400 |
| C | 0.54739300  | 1.35534000  | 2.10992300  |
| H | -0.35785700 | 1.49720200  | 1.50509800  |
| H | 0.26087300  | 0.75514800  | 2.97906800  |
| H | 0.85984600  | 2.33700800  | 2.47618900  |
| C | 5.31478300  | 3.01991500  | 0.44996200  |
| H | 4.53278100  | 3.68167200  | 0.06078900  |
| H | 5.26667700  | 3.07349400  | 1.54339000  |
| H | 6.28316700  | 3.40972700  | 0.13058500  |
| O | 4.72728600  | -1.03618500 | -0.92502000 |
| O | 6.73174700  | -1.00273600 | -1.90771900 |
| H | -4.52569600 | 0.41827200  | 1.23193200  |
| H | -4.57774800 | -1.97753500 | 0.09627700  |

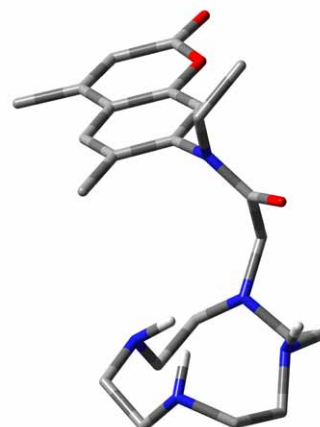



[4.[3333].2.ii.e.N4-CH<sub>3</sub>]<sup>+</sup>

|   |             |             |             |
|---|-------------|-------------|-------------|
| C | 5.09391900  | 0.35646600  | 0.77285800  |
| C | 4.32090800  | 1.66724300  | 0.88314900  |
| N | 2.99243700  | 1.46541300  | 1.43793300  |
| C | 2.26570500  | 2.71339200  | 1.70843600  |
| C | 1.62286100  | 3.32422100  | 0.45279800  |
| N | 0.63522400  | 2.38487200  | -0.10855100 |
| C | 0.56955900  | 2.29215400  | -1.56606400 |
| C | 1.69127500  | 1.45374800  | -2.20594900 |
| N | 1.97242700  | 0.14579800  | -1.58405100 |
| C | 3.08238800  | -0.54501000 | -2.24921300 |
| C | 4.43220600  | -0.18338500 | -1.62233900 |
| N | 4.49051700  | -0.64955100 | -0.18291200 |
| H | 2.92939600  | -1.62525500 | -2.17593100 |
| H | 3.13564900  | -0.30799200 | -3.32391900 |
| H | 1.47730100  | 2.49899500  | 2.43950200  |
| H | 2.94543100  | 3.43257300  | 2.17969000  |
| H | 5.11264700  | -0.13126100 | 1.74974900  |
| H | 6.12066800  | 0.53476800  | 0.43918300  |
| H | 0.59736900  | 3.27259700  | -2.07168600 |
| H | -0.40374300 | 1.86057600  | -1.82174200 |
| H | 3.49219700  | -0.85630400 | 0.09973100  |
| H | 1.44486600  | 1.34791100  | -3.27788100 |
| H | 5.26264600  | -0.64278000 | -2.16444900 |
| H | 4.89920500  | 2.28629700  | 1.57985200  |
| H | 1.17307000  | 4.29807500  | 0.69345700  |
| H | 2.62595100  | 2.02622100  | -2.16896700 |
| H | 2.39502200  | 3.52204300  | -0.30000400 |
| H | 4.35073500  | 2.20860000  | -0.08096700 |
| H | 4.58078300  | 0.89582800  | -1.63462900 |
| C | 0.81078600  | -0.70077400 | -1.33205200 |
| H | -0.08006900 | -0.08653100 | -1.26207700 |
| H | 0.61929800  | -1.42370900 | -2.14440600 |
| C | 0.98590400  | -1.50724700 | -0.03680000 |
| O | 2.12634200  | -1.77260300 | 0.39132700  |
| N | -0.11497600 | -1.98626500 | 0.59026300  |
| C | 0.07498400  | -2.80408200 | 1.81636500  |
| H | -0.80993500 | -3.43597800 | 1.91570000  |
| H | 0.93812000  | -3.44874100 | 1.64369500  |
| C | 0.27671800  | -1.95256500 | 3.06929000  |
| H | 1.16718400  | -1.32620800 | 2.97318800  |
| H | -0.58845700 | -1.31052800 | 3.25802800  |
| H | 0.40658800  | -2.60342400 | 3.93919100  |
| C | -1.44586400 | -1.51133400 | 0.30688800  |
| C | -1.74441200 | -0.18673800 | 0.62201600  |
| C | -2.42056200 | -2.36875200 | -0.24626000 |
| C | -3.01153200 | 0.32226000  | 0.35338900  |
| H | -0.98422400 | 0.46447900  | 1.03762600  |
| C | -3.69186100 | -1.83468300 | -0.46749000 |
| C | -4.02107300 | -0.49787800 | -0.18300500 |
| H | -4.45305300 | -2.48024000 | -0.89313100 |
| C | -4.44259700 | 2.26874000  | 0.39298100  |
| C | -5.33258000 | 0.09841700  | -0.41735800 |
| C | -5.50095100 | 1.41301900  | -0.12805800 |
| H | -6.45111100 | 1.91165200  | -0.28148300 |
| C | -2.12152600 | -3.80670400 | -0.59505100 |
| H | -1.10297500 | -3.92774500 | -0.97387100 |
| H | -2.22231200 | -4.46526600 | 0.27591200  |
| H | -2.81416900 | -4.17215700 | -1.35675900 |
| C | -6.45713600 | -0.73593100 | -0.96384900 |
| H | -6.20043600 | -1.15008500 | -1.94546800 |
| H | -6.67621300 | -1.58159600 | -0.30243200 |
| H | -7.36686500 | -0.14336200 | -1.07240500 |
| O | -3.20733400 | 1.64097600  | 0.62744900  |
| O | -4.52029000 | 3.44633400  | 0.63400400  |
| H | 2.41693900  | 0.94377100  | 0.77500300  |
| H | -0.28784000 | 2.62453800  | 0.24124600  |
| C | 5.18162500  | -1.97176500 | -0.06233800 |
| H | 5.05866300  | -2.33876000 | 0.95643500  |
| H | 4.71946000  | -2.67615300 | -0.75349600 |
| H | 6.24060100  | -1.85123500 | -0.29656300 |

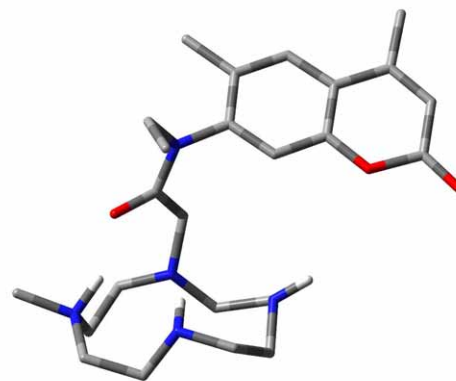

[4.**[3333]**.2.ii.e.N7-CH<sub>3</sub>]<sup>+</sup>

|   |             |             |             |
|---|-------------|-------------|-------------|
| C | 5.18652900  | -1.49944700 | -0.44902000 |
| C | 5.38110500  | -0.03177600 | -0.01276500 |
| N | 4.33748400  | 0.48474300  | 0.95984700  |
| C | 4.49147800  | 1.97866000  | 1.15871600  |
| C | 3.88337100  | 2.79632900  | 0.02052500  |
| N | 2.43233800  | 2.65631300  | 0.02540500  |
| C | 1.76558000  | 2.81073300  | -1.27107300 |
| C | 1.93305100  | 1.59003300  | -2.19230400 |
| N | 1.79786400  | 0.29188200  | -1.52413000 |
| C | 2.13842000  | -0.82491400 | -2.42709900 |
| C | 3.61800200  | -1.20658600 | -2.35690000 |
| N | 3.92448400  | -1.82808400 | -1.06838300 |
| H | 1.55293300  | -1.70443300 | -2.13573200 |
| H | 1.85881600  | -0.59837400 | -3.46773000 |
| H | 3.98683300  | 2.22721600  | 2.09528200  |
| H | 5.55920800  | 2.17914300  | 1.28214700  |
| H | 5.34509900  | -2.16699900 | 0.40492000  |
| H | 6.00893500  | -1.71158300 | -1.14358800 |
| H | 2.10230000  | 3.69639500  | -1.83533300 |
| H | 0.70447700  | 2.97874900  | -1.06316100 |
| H | 3.15978900  | -1.69628300 | -0.41209500 |
| H | 1.22343100  | 1.71168300  | -3.03151100 |
| H | 3.84362300  | -1.90399100 | -3.17522200 |
| H | 6.35227900  | 0.10414300  | 0.47348600  |
| H | 4.23267900  | 3.83461500  | 0.13739700  |
| H | 2.93023900  | 1.60924900  | -2.64708000 |
| H | 4.27411100  | 2.45913200  | -0.94394900 |
| H | 5.34101900  | 0.62766800  | -0.88019500 |
| H | 4.22675300  | -0.30782200 | -2.54916900 |
| C | 0.53666300  | 0.09874300  | -0.82580000 |
| H | 0.13956300  | 1.06334000  | -0.50256500 |
| H | -0.24450500 | -0.34807800 | -1.45868600 |
| C | 0.71748700  | -0.73888800 | 0.45178600  |
| O | 1.83828800  | -0.89830200 | 0.96772800  |
| N | -0.39267600 | -1.29564400 | 0.99815500  |
| C | -0.26139300 | -2.09131100 | 2.24140000  |
| H | -1.06976800 | -2.82616000 | 2.23537400  |
| H | 0.68810500  | -2.62601600 | 2.18249200  |
| C | -0.32488900 | -1.23999000 | 3.50882900  |
| H | 0.48986800  | -0.51104800 | 3.52642800  |
| H | -1.27591400 | -0.70532700 | 3.58438400  |
| H | -0.22942400 | -1.88035100 | 4.39088400  |
| C | -1.72473100 | -1.01656400 | 0.52143700  |
| C | -2.31191500 | 0.20057400  | 0.85813800  |
| C | -2.42584600 | -1.98163700 | -0.23649200 |
| C | -3.60974000 | 0.48814200  | 0.43437800  |
| H | -1.78015800 | 0.93396000  | 1.45379200  |
| C | -3.72468400 | -1.66660100 | -0.63445400 |
| C | -4.34617100 | -0.44566400 | -0.31661400 |
| H | -4.27528900 | -2.39566200 | -1.21952100 |
| C | -5.40515600 | 2.10199100  | 0.41621800  |
| C | -5.70216200 | -0.08420000 | -0.71798500 |
| C | -6.17626700 | 1.13226200  | -0.35174400 |
| H | -7.17513700 | 1.45781200  | -0.61884100 |
| C | -1.80041600 | -3.30182100 | -0.61695600 |
| H | -0.80683600 | -3.16911500 | -1.05722900 |
| H | -1.67764000 | -3.96230100 | 0.24885100  |
| H | -2.42262400 | -3.82858600 | -1.34359100 |
| C | -6.53883800 | -1.04671000 | -1.51397700 |
| H | -6.05811200 | -1.29265400 | -2.46764700 |
| H | -6.68120300 | -1.98762200 | -0.97067700 |
| H | -7.52232700 | -0.62512100 | -1.72761600 |
| O | -4.11069000 | 1.70055900  | 0.78519100  |
| O | -5.76645300 | 3.19899700  | 0.75719000  |
| H | 3.38052400  | 0.29907900  | 0.57321200  |
| H | 2.03014000  | 3.31226200  | 0.68844600  |
| C | 4.39863300  | -0.22764100 | 2.27701300  |
| H | 5.36711700  | -0.03208300 | 2.74066400  |
| H | 3.59013400  | 0.14194400  | 2.90526300  |
| H | 4.25667400  | -1.29358300 | 2.11944500  |

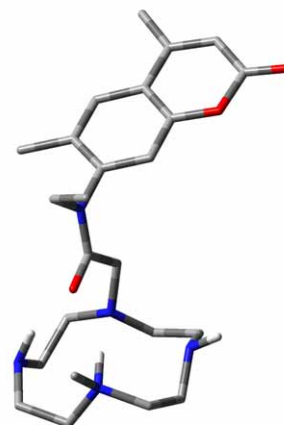

4.[3333].3.eii

|   |             |             |             |
|---|-------------|-------------|-------------|
| C | 2.54767500  | 2.92914600  | 0.41733700  |
| C | 3.95595100  | 2.71950400  | -0.14889900 |
| N | 3.93510100  | 2.03370700  | -1.44351200 |
| C | 4.86870800  | 0.91931300  | -1.59816500 |
| C | 4.62872700  | -0.30382900 | -0.69162300 |
| N | 3.28072500  | -0.82671300 | -0.89282700 |
| C | 2.97986400  | -2.08354600 | -0.21325500 |
| C | 2.55875000  | -1.96642300 | 1.26387900  |
| N | 1.28213100  | -1.22865700 | 1.43463400  |
| C | 1.35063900  | -0.11680100 | 2.39112800  |
| C | 2.24917300  | 1.05436200  | 1.98173800  |
| N | 1.86515500  | 1.66240900  | 0.71075600  |
| H | 0.33095500  | 0.27054900  | 2.51337000  |
| H | 1.67614800  | -0.45251800 | 3.39481500  |
| H | 4.80814800  | 0.58392600  | -2.63993800 |
| H | 5.88888300  | 1.29172200  | -1.43765400 |
| H | 1.93741600  | 3.46508000  | -0.31792100 |
| H | 2.61748500  | 3.57991200  | 1.30775200  |
| H | 3.85895600  | -2.73811200 | -0.27453500 |
| H | 2.17948600  | -2.60006900 | -0.75288000 |
| H | 2.46750000  | -2.97464300 | 1.69016000  |
| H | 2.21922700  | 1.77872100  | 2.81896000  |
| H | 4.42952400  | 3.70747800  | -0.25170200 |
| H | 5.34981600  | -1.08382200 | -0.97178700 |
| H | 3.34504500  | -1.45228400 | 1.82813500  |
| H | 4.85969800  | -0.04235200 | 0.36033100  |
| H | 4.55973000  | 2.17107400  | 0.58963400  |
| H | 3.29154400  | 0.72355800  | 1.91364900  |
| C | 0.15195300  | -2.11291300 | 1.75157500  |
| H | 0.37311100  | -2.78822500 | 2.59581200  |
| H | -0.70232800 | -1.49411800 | 2.03331800  |
| C | -0.21485500 | -3.02791000 | 0.57852400  |
| O | 0.39120000  | -4.07801400 | 0.39294900  |
| N | -1.26323500 | -2.65658700 | -0.24887400 |
| C | -1.53232700 | -3.52214300 | -1.41807800 |
| H | -1.34869200 | -4.55043100 | -1.10286500 |
| H | -2.58972300 | -3.42228700 | -1.67201300 |
| C | -0.66323800 | -3.17154200 | -2.62640000 |
| H | -0.81592900 | -2.13434000 | -2.94024400 |
| H | 0.39488600  | -3.31334100 | -2.39487300 |
| H | -0.91776400 | -3.82200800 | -3.46983700 |
| C | -1.94902300 | -1.40451600 | -0.17583500 |
| C | -1.23671700 | -0.21935900 | -0.36366200 |
| C | -3.34621400 | -1.37123400 | 0.07335900  |
| C | -1.89819000 | 1.00371800  | -0.29407900 |
| H | -0.16409800 | -0.24039800 | -0.51641100 |
| C | -3.97805900 | -0.13027300 | 0.09560300  |
| C | -3.28594700 | 1.08047300  | -0.08844500 |
| H | -5.04615800 | -0.09899800 | 0.28626200  |
| C | -1.66793900 | 3.41213800  | -0.38140900 |
| C | -3.90349900 | 2.39829100  | -0.06159400 |
| C | -3.11077300 | 3.49019000  | -0.21416800 |
| H | -3.51583100 | 4.49546200  | -0.20133300 |
| C | -4.14137100 | -2.62633800 | 0.34280000  |
| H | -4.50114400 | -3.09361000 | -0.58174900 |
| H | -3.53910000 | -3.37263900 | 0.86720200  |
| H | -5.01983200 | -2.40117700 | 0.95327900  |
| C | -5.38889100 | 2.53409800  | 0.13093600  |
| H | -5.93700100 | 2.00320300  | -0.65538500 |
| H | -5.70208300 | 2.10362600  | 1.08886100  |
| H | -5.69234300 | 3.58247400  | 0.11226700  |
| O | -1.12757700 | 2.12583900  | -0.43217000 |
| O | -0.90171300 | 4.34352100  | -0.47067200 |
| H | 0.86241700  | 1.82225500  | 0.68923800  |
| H | 2.60589200  | -0.12378200 | -0.58570900 |
| H | 2.99534900  | 1.69380800  | -1.62590200 |

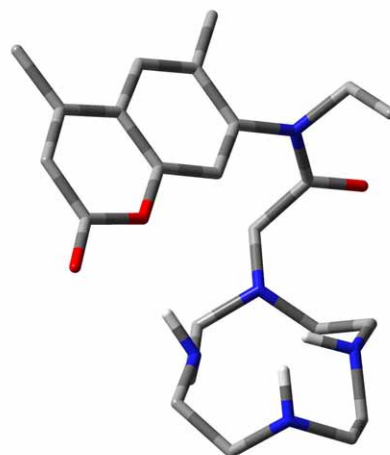

[4.[3333].3.eii.N10-CH<sub>3</sub>]<sup>+3</sup>

|   |             |             |             |
|---|-------------|-------------|-------------|
| C | 2.64363200  | 2.64692000  | 0.40817400  |
| C | 4.13602100  | 2.48486400  | 0.11544400  |
| N | 4.35903500  | 1.71606200  | -1.11904200 |
| C | 5.23443600  | 0.55816200  | -1.04241100 |
| C | 4.59905600  | -0.62362500 | -0.29520800 |
| N | 3.14878700  | -0.87691100 | -0.63436900 |
| C | 2.66571300  | -2.16583900 | 0.00751300  |
| C | 2.18212000  | -2.01819900 | 1.45042700  |
| N | 0.94347600  | -1.22978000 | 1.54740300  |
| C | 1.01211100  | -0.09993300 | 2.48420500  |
| C | 2.05097500  | 0.96307900  | 2.11756000  |
| N | 1.97815000  | 1.35586200  | 0.69881100  |
| H | 0.02572800  | 0.37636700  | 2.47740400  |
| H | 1.20050400  | -0.42020600 | 3.52453200  |
| H | 5.47112800  | 0.25146200  | -2.06591000 |
| H | 6.20243500  | 0.74564600  | -0.54525900 |
| H | 2.14626300  | 3.08621500  | -0.46016400 |
| H | 2.50910000  | 3.35273000  | 1.24163600  |
| H | 3.48520900  | -2.88790000 | -0.05442800 |
| H | 1.84385100  | -2.54758400 | -0.59515700 |
| H | 2.02361100  | -3.03920800 | 1.81699900  |
| H | 1.88460900  | 1.82231600  | 2.78532900  |
| H | 4.58574400  | 3.48269100  | 0.04178700  |
| H | 5.16037800  | -1.53682400 | -0.51298700 |
| H | 2.96381600  | -1.57937100 | 2.08045500  |
| H | 4.62938600  | -0.46612500 | 0.78523100  |
| H | 4.63918400  | 1.99409400  | 0.95881900  |
| H | 3.06648600  | 0.61037700  | 2.33656000  |
| C | -0.25952700 | -2.04761400 | 1.79382700  |
| H | -0.11129900 | -2.75179100 | 2.62874100  |
| H | -1.07556500 | -1.37885100 | 2.06537400  |
| C | -0.63955900 | -2.91471700 | 0.58622800  |
| O | 0.04381000  | -3.89684300 | 0.30151600  |
| N | -1.78726600 | -2.60007000 | -0.11470200 |
| C | -2.17652700 | -3.51846900 | -1.21210100 |
| H | -1.96085800 | -4.53077500 | -0.86761000 |
| H | -3.25528100 | -3.42702600 | -1.34895000 |
| C | -1.44654700 | -3.23540500 | -2.52495700 |
| H | -1.62718400 | -2.21318900 | -2.87195500 |
| H | -0.37106800 | -3.39045200 | -2.40568600 |
| H | -1.80056600 | -3.92066700 | -3.30100300 |
| C | -2.33218900 | -1.27631100 | -0.11641700 |
| C | -1.46284400 | -0.21840600 | -0.38095800 |
| C | -3.70159800 | -1.02598000 | 0.14460600  |
| C | -1.91878700 | 1.09164000  | -0.34495300 |
| H | -0.41343800 | -0.40764900 | -0.56379900 |
| C | -4.13492500 | 0.30133200  | 0.11388500  |
| C | -3.27256600 | 1.38816700  | -0.12463500 |
| H | -5.18270700 | 0.50159300  | 0.31285100  |
| C | -1.30541900 | 3.42877200  | -0.49836400 |
| C | -3.67340200 | 2.79001800  | -0.13908300 |
| C | -2.71576900 | 3.73612100  | -0.33078300 |
| H | -2.95693300 | 4.79259400  | -0.34704900 |
| C | -4.67302300 | -2.13109900 | 0.48171100  |
| H | -5.12895600 | -2.56364500 | -0.41675700 |
| H | -4.18094700 | -2.94343700 | 1.02262700  |
| H | -5.48751300 | -1.75081300 | 1.10297200  |
| C | -5.11506600 | 3.16630100  | 0.05547400  |
| H | -5.74692800 | 2.70603200  | -0.71215000 |
| H | -5.48352700 | 2.82030000  | 1.02779600  |
| H | -5.24901800 | 4.24799800  | 0.00593900  |
| O | -0.97574500 | 2.06616900  | -0.52336700 |
| O | -0.39145800 | 4.21282800  | -0.60743800 |
| H | 0.99792100  | 1.45828100  | 0.43821800  |
| H | 2.60847100  | -0.03603000 | -0.21738100 |
| H | 4.66558900  | 2.32704800  | -1.86704500 |
| C | 2.89406900  | -0.89595800 | -2.10839300 |
| H | 3.14190500  | 0.08337300  | -2.51194500 |
| H | 3.49383000  | -1.68105900 | -2.57393500 |
| H | 1.83619800  | -1.10280600 | -2.27124700 |

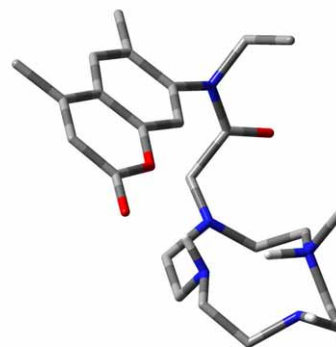

<sup>3</sup> Structure is more stable and has been optimized with an extraannular N7-H.

[4.[3333].3.eii.N7-CH<sub>3</sub>]<sup>+</sup>

|   |             |             |             |
|---|-------------|-------------|-------------|
| C | 3.12361700  | 1.61241500  | 1.33156200  |
| C | 4.17673200  | 1.19986800  | 0.29384100  |
| N | 3.48251400  | 0.87526900  | -1.01461900 |
| C | 4.02254900  | -0.36587000 | -1.69653800 |
| C | 3.64347200  | -1.64805000 | -0.95569000 |
| N | 2.19581200  | -1.76767600 | -0.87476600 |
| C | 1.67461000  | -3.08701800 | -0.46905900 |
| C | 1.35998400  | -3.15650600 | 1.03653600  |
| N | 0.52467300  | -2.00651500 | 1.46177200  |
| C | 1.03736700  | -1.31266700 | 2.65042400  |
| C | 2.29488100  | -0.46860100 | 2.41144600  |
| N | 2.07981100  | 0.58688200  | 1.40840000  |
| H | 0.24915500  | -0.63990600 | 3.01018300  |
| H | 1.25082900  | -2.00608100 | 3.48287100  |
| H | 3.57555000  | -0.38425700 | -2.69184500 |
| H | 5.10488700  | -0.23925700 | -1.78521400 |
| H | 2.66472500  | 2.55661100  | 1.02469600  |
| H | 3.63705800  | 1.78639700  | 2.28870800  |
| H | 2.39366200  | -3.87079500 | -0.73201700 |
| H | 0.76380100  | -3.29939200 | -1.03379500 |
| H | 0.85998800  | -4.10669400 | 1.25904600  |
| H | 2.59518600  | -0.04555800 | 3.38405900  |
| H | 4.90694200  | 1.98964600  | 0.10772000  |
| H | 4.03867600  | -2.47100800 | -1.56117100 |
| H | 2.29581000  | -3.14001400 | 1.60668700  |
| H | 4.17515500  | -1.70569000 | 0.01211100  |
| H | 4.70958200  | 0.30374800  | 0.61396100  |
| H | 3.12560400  | -1.10534800 | 2.08434100  |
| C | -0.90102100 | -2.34084000 | 1.63117700  |
| H | -1.04967800 | -3.12982700 | 2.38659100  |
| H | -1.42069300 | -1.44399600 | 1.97439200  |
| C | -1.55873200 | -2.88896500 | 0.35715400  |
| O | -1.40608500 | -4.06418200 | 0.04274700  |
| N | -2.37986000 | -2.05125800 | -0.37637900 |
| C | -3.05668200 | -2.63478300 | -1.55916600 |
| H | -3.33769700 | -3.65464300 | -1.29220200 |
| H | -3.96939400 | -2.06061000 | -1.73196200 |
| C | -2.18298000 | -2.63480400 | -2.81327600 |
| H | -1.86895000 | -1.62175300 | -3.08397100 |
| H | -1.29550600 | -3.25402500 | -2.66368400 |
| H | -2.74607900 | -3.04847600 | -3.65558900 |
| C | -2.40019100 | -0.63128300 | -0.22627400 |
| C | -1.22614400 | 0.08606200  | -0.46161800 |
| C | -3.59332600 | 0.04270300  | 0.14307600  |
| C | -1.21760500 | 1.46743700  | -0.30524400 |
| H | -0.32029900 | -0.42882200 | -0.75438200 |
| C | -3.55228700 | 1.43130000  | 0.24983600  |
| C | -2.37924400 | 2.17961500  | 0.03406800  |
| H | -4.46059800 | 1.95301800  | 0.53266900  |
| C | 0.12613900  | 3.47579000  | -0.32422400 |
| C | -2.28946800 | 3.62722500  | 0.15163900  |
| C | -1.07836800 | 4.22104400  | -0.03516800 |
| H | -0.94944000 | 5.29362800  | 0.04834500  |
| C | -4.87167500 | -0.70230500 | 0.43964800  |
| H | -5.45472700 | -0.88646500 | -0.47020100 |
| H | -4.66944600 | -1.67420800 | 0.89621700  |
| H | -5.50584600 | -0.12670200 | 1.11804800  |
| C | -3.51032200 | 4.43967300  | 0.47727600  |
| H | -4.29207100 | 4.28840300  | -0.27502700 |
| H | -3.93120000 | 4.14352800  | 1.44451300  |
| H | -3.27519500 | 5.50425200  | 0.51858900  |
| O | -0.01141300 | 2.10276500  | -0.48827500 |
| O | 1.25400000  | 3.92935900  | -0.42275900 |
| H | 1.17621500  | 1.02366900  | 1.55588500  |
| H | 1.82703200  | -1.11063200 | -0.18476500 |
| H | 2.51253300  | 0.65684100  | -0.72580200 |
| C | 3.43113500  | 2.05347300  | -1.94396000 |
| H | 4.44893100  | 2.30197700  | -2.24768400 |
| H | 2.84020500  | 1.77553000  | -2.81724600 |
| H | 2.94797300  | 2.88699800  | -1.43243100 |

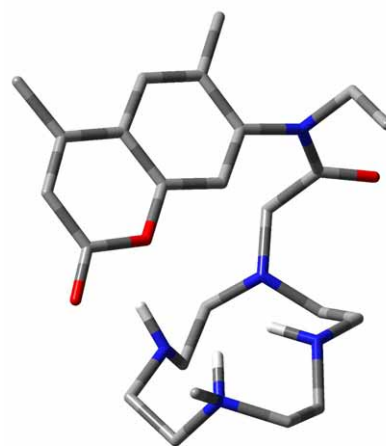

4.[3333].4.iei

|   |             |             |             |
|---|-------------|-------------|-------------|
| C | 5.25133700  | -1.92836100 | -0.45348600 |
| C | 6.12462400  | -0.68882100 | -0.17536900 |
| N | 5.56305900  | 0.11174400  | 0.91084000  |
| C | 5.89294100  | 1.53873700  | 0.89993300  |
| C | 4.93903800  | 2.31598700  | -0.01347600 |
| N | 3.58145000  | 2.23216200  | 0.50413900  |
| C | 2.53277800  | 2.71024500  | -0.38144100 |
| C | 2.22660700  | 1.84269600  | -1.62362900 |
| N | 1.84313500  | 0.47524600  | -1.28219500 |
| C | 2.21709000  | -0.55542300 | -2.25178500 |
| C | 3.67314300  | -1.00447300 | -2.09935100 |
| N | 3.86390600  | -1.65661000 | -0.81116500 |
| H | 1.58495200  | -1.43260400 | -2.07874000 |
| H | 2.03996000  | -0.22367400 | -3.29051400 |
| H | 5.76979000  | 1.92121900  | 1.91873400  |
| H | 6.93568800  | 1.73759600  | 0.59504400  |
| H | 5.24804100  | -2.56395900 | 0.44276200  |
| H | 5.71844600  | -2.52211400 | -1.25134800 |
| H | 2.78471600  | 3.72236300  | -0.72678000 |
| H | 1.61410300  | 2.81690300  | 0.21127800  |
| H | 3.44780800  | -1.07117000 | -0.08623400 |
| H | 3.38283500  | 1.26728400  | 0.76727500  |
| H | 1.45247900  | 2.35104900  | -2.23267400 |
| H | 3.90457600  | -1.71845800 | -2.90343500 |
| H | 7.16660200  | -1.00695500 | 0.01436600  |
| H | 5.25312600  | 3.36955700  | -0.04052100 |
| H | 3.12083700  | 1.78563300  | -2.25137500 |
| H | 5.05420900  | 1.93734900  | -1.04782000 |
| H | 6.16014200  | -0.06187800 | -1.07232500 |
| H | 4.33072400  | -0.13130200 | -2.26897000 |
| H | 5.79266000  | -0.30156500 | 1.80807400  |
| C | 0.55112900  | 0.32101600  | -0.65648200 |
| H | 0.05186600  | 1.29457100  | -0.55854900 |
| H | -0.13010800 | -0.28776200 | -1.26439300 |
| C | 0.64409200  | -0.26361700 | 0.77057700  |
| O | 1.70735300  | -0.34673500 | 1.37412800  |
| N | -0.54424200 | -0.62149100 | 1.37875500  |
| C | -0.50585600 | -0.93052400 | 2.82506200  |
| H | 0.29515200  | -0.32691000 | 3.25663600  |
| H | -1.45722200 | -0.60254100 | 3.25371600  |
| C | -0.25943100 | -2.40727000 | 3.13382600  |
| H | -1.06661400 | -3.04053200 | 2.75265200  |
| H | 0.68687600  | -2.73212200 | 2.69417600  |
| H | -0.20194900 | -2.55598400 | 4.21734900  |
| C | -1.82043600 | -0.57532600 | 0.72627800  |
| C | -2.66299400 | 0.50306400  | 0.99927000  |
| C | -2.24508200 | -1.61936600 | -0.13261300 |
| C | -3.93030300 | 0.56842800  | 0.42465100  |
| H | -2.34041400 | 1.30198000  | 1.65773400  |
| C | -3.51615100 | -1.51996600 | -0.69655000 |
| C | -4.38368100 | -0.44375300 | -0.44075900 |
| H | -3.85113400 | -2.31529000 | -1.35464100 |
| C | -5.97889400 | 1.82748800  | 0.21692200  |
| C | -5.71857100 | -0.31125500 | -1.00761800 |
| C | -6.45371700 | 0.77983500  | -0.67726400 |
| H | -7.45314500 | 0.93356100  | -1.06795500 |
| C | -1.36467300 | -2.80215600 | -0.45745300 |
| H | -0.62551400 | -2.55797500 | -1.23017200 |
| H | -0.80605600 | -3.14680700 | 0.41457800  |
| H | -1.96385800 | -3.63471100 | -0.83499800 |
| C | -6.25602200 | -1.36523800 | -1.93616000 |
| H | -5.61791500 | -1.47301500 | -2.82049800 |
| H | -6.29116300 | -2.34329200 | -1.44308100 |
| H | -7.26442300 | -1.11441700 | -2.27047000 |
| O | -4.69462900 | 1.65323000  | 0.73714200  |
| O | -6.59010400 | 2.81687100  | 0.54248000  |

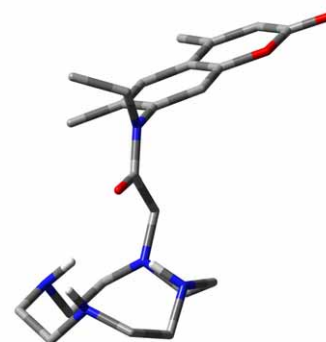

[4.[3333].4.iei.N10-CH<sub>3</sub>]<sup>+</sup>

|   |             |             |             |
|---|-------------|-------------|-------------|
| C | -4.13269900 | 2.75410000  | 0.19760000  |
| C | -5.34045900 | 1.80198500  | 0.12697500  |
| N | -5.03831900 | 0.52553800  | 0.79708900  |
| C | -5.81750200 | -0.62336800 | 0.35155300  |
| C | -5.07327300 | -1.38949400 | -0.75070300 |
| N | -3.72514400 | -1.89164700 | -0.30008700 |
| C | -2.83507000 | -2.32764300 | -1.44170900 |
| C | -2.31254200 | -1.17797300 | -2.31087500 |
| N | -1.65285200 | -0.12292300 | -1.55766200 |
| C | -1.67906400 | 1.19960900  | -2.21589200 |
| C | -2.90914400 | 2.00801300  | -1.80637900 |
| N | -2.89862200 | 2.21100200  | -0.36329900 |
| H | -0.79063700 | 1.75442100  | -1.90520600 |
| H | -1.63514100 | 1.10240200  | -3.31056500 |
| H | -6.02089800 | -1.28168600 | 1.20128500  |
| H | -6.80271500 | -0.35358200 | -0.05936100 |
| H | -3.94221200 | 3.01417700  | 1.24646200  |
| H | -4.38425600 | 3.69087200  | -0.31304400 |
| H | -3.39272900 | -3.04592600 | -2.04947200 |
| H | -2.00106300 | -2.85699400 | -0.97716500 |
| H | -2.73082700 | 1.30939500  | 0.07954000  |
| H | -3.19005400 | -1.12325500 | 0.17705600  |
| H | -1.65514700 | -1.64935600 | -3.06555800 |
| H | -2.87943100 | 2.98087600  | -2.31323200 |
| H | -6.23235900 | 2.29267700  | 0.54684800  |
| H | -5.64695400 | -2.25401000 | -1.09872200 |
| H | -3.13749900 | -0.72864300 | -2.87053100 |
| H | -4.89865300 | -0.72708300 | -1.59930500 |
| H | -5.57576600 | 1.58403100  | -0.92037200 |
| H | -3.81436500 | 1.49531800  | -2.18736300 |
| H | -5.11297400 | 0.63742700  | 1.80267900  |
| C | -0.40382000 | -0.48095400 | -0.89882500 |
| H | -0.04160000 | -1.46647300 | -1.23080500 |
| H | 0.39030100  | 0.21928700  | -1.16249000 |
| C | -0.56334500 | -0.56582000 | 0.63208700  |
| O | -1.66213600 | -0.87283400 | 1.13017400  |
| N | 0.52880300  | -0.36775300 | 1.40644400  |
| C | 0.43283500  | -0.65983800 | 2.85973400  |
| H | -0.27497700 | -1.48354800 | 2.97098500  |
| H | 1.41898800  | -1.00933700 | 3.17422500  |
| C | -0.01449100 | 0.53004900  | 3.70660300  |
| H | 0.71177800  | 1.34579000  | 3.67316200  |
| H | -0.98382400 | 0.90429800  | 3.36846200  |
| H | -0.11367000 | 0.21578400  | 4.75019300  |
| C | 1.81296100  | 0.01994200  | 0.86959300  |
| C | 2.75233200  | -0.98640600 | 0.65592800  |
| C | 2.11529700  | 1.37492600  | 0.60267000  |
| C | 4.01938000  | -0.66639700 | 0.17001800  |
| H | 2.51720900  | -2.02446800 | 0.86442900  |
| C | 3.39046900  | 1.65670100  | 0.10813700  |
| C | 4.36394400  | 0.66800500  | -0.11431500 |
| H | 3.64008300  | 2.69061200  | -0.10609800 |
| C | 6.17928800  | -1.49797100 | -0.51464800 |
| C | 5.70608100  | 0.93515800  | -0.62197100 |
| C | 6.54444400  | -0.11537100 | -0.79926000 |
| H | 7.55341700  | 0.01828100  | -1.17226100 |
| C | 1.13270000  | 2.49911600  | 0.84152100  |
| H | 0.11782700  | 2.27098300  | 0.50172500  |
| H | 1.05792200  | 2.74454700  | 1.90618600  |
| H | 1.45980700  | 3.40429500  | 0.32433400  |
| C | 6.13343800  | 2.34254600  | -0.93313000 |
| H | 5.48716500  | 2.79218400  | -1.69547300 |
| H | 6.07517100  | 2.97820400  | -0.04241700 |
| H | 7.16040800  | 2.36611600  | -1.30117600 |
| O | 4.88034500  | -1.69861900 | -0.01998800 |
| O | 6.87594500  | -2.46857500 | -0.66335300 |
| C | -3.83666300 | -2.99852700 | 0.70282200  |
| H | -4.47494500 | -2.68328500 | 1.52542400  |
| H | -4.25765100 | -3.88208900 | 0.21990600  |
| H | -2.84062100 | -3.20388500 | 1.09044000  |

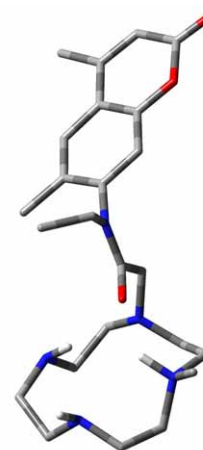

[4.**[3333]**.4.iei.N4-CH<sub>3</sub>]<sup>+</sup>

|   |             |             |             |
|---|-------------|-------------|-------------|
| C | 5.52590400  | -0.69371800 | 0.25186000  |
| C | 5.61732700  | 0.80904000  | 0.50617500  |
| N | 4.50743300  | 1.27483100  | 1.32406200  |
| C | 4.28880400  | 2.73522200  | 1.29175600  |
| C | 3.41196000  | 3.12615100  | 0.10156700  |
| N | 2.10247300  | 2.50795100  | 0.25003100  |
| C | 1.25330900  | 2.51197600  | -0.93026100 |
| C | 1.65836500  | 1.53386100  | -2.05445800 |
| N | 1.80016200  | 0.14892100  | -1.57682000 |
| C | 2.68796700  | -0.69104900 | -2.36660100 |
| C | 4.13419900  | -0.65178600 | -1.85133600 |
| N | 4.25085600  | -1.14090200 | -0.42841500 |
| H | 2.31731200  | -1.72099200 | -2.36935900 |
| H | 2.72327300  | -0.38460300 | -3.42371100 |
| H | 3.76146400  | 3.00914400  | 2.20969900  |
| H | 5.23371100  | 3.29913700  | 1.26884800  |
| H | 5.56126100  | -1.23320000 | 1.20229500  |
| H | 6.36152900  | -1.04033900 | -0.36363200 |
| H | 1.22390800  | 3.52290800  | -1.35311600 |
| H | 0.22482900  | 2.29676300  | -0.61358300 |
| H | 3.41216700  | -0.76743400 | 0.09315900  |
| H | 2.24349500  | 1.55049400  | 0.56521900  |
| H | 0.93303900  | 1.60818500  | -2.88363800 |
| H | 4.80031800  | -1.26154400 | -2.46969400 |
| H | 6.61290300  | 0.99138800  | 0.94698900  |
| H | 3.30442300  | 4.21790000  | 0.08210500  |
| H | 2.62829100  | 1.83772100  | -2.46236700 |
| H | 3.93629100  | 2.85681200  | -0.83784600 |
| H | 5.61139000  | 1.36054500  | -0.43865600 |
| H | 4.49336300  | 0.37667200  | -1.86885500 |
| H | 4.63471300  | 0.96913300  | 2.28448000  |
| C | 0.58183500  | -0.47281800 | -1.08333600 |
| H | -0.25872300 | 0.21901300  | -1.16656700 |
| H | 0.29939600  | -1.35033700 | -1.68316800 |
| C | 0.72604000  | -0.93177600 | 0.38190400  |
| O | 1.85136800  | -1.11995100 | 0.87842100  |
| N | -0.40480400 | -1.12560000 | 1.10301200  |
| C | -0.28922000 | -1.45778000 | 2.54543800  |
| H | 0.66720600  | -1.05898900 | 2.88572800  |
| H | -1.08986000 | -0.91865100 | 3.05784200  |
| C | -0.37937500 | -2.95366100 | 2.84018800  |
| H | -1.33842700 | -3.37168300 | 2.52163600  |
| H | 0.42712500  | -3.50005300 | 2.34269100  |
| H | -0.28538300 | -3.12033600 | 3.91752700  |
| C | -1.72751500 | -0.89883200 | 0.57047200  |
| C | -2.35447500 | 0.30238100  | 0.90666100  |
| C | -2.38658300 | -1.86886300 | -0.21510900 |
| C | -3.64839800 | 0.56266400  | 0.46187400  |
| H | -1.84812500 | 1.04498400  | 1.51380500  |
| C | -3.68559200 | -1.57647800 | -0.64005900 |
| C | -4.34405100 | -0.37912800 | -0.32190900 |
| H | -4.20827800 | -2.31560700 | -1.23842100 |
| C | -5.48603100 | 2.12698800  | 0.42590100  |
| C | -5.70184100 | -0.04962000 | -0.74539600 |
| C | -6.21521000 | 1.14808900  | -0.37267600 |
| H | -7.21680300 | 1.45127300  | -0.65550400 |
| C | -1.74543700 | -3.17543100 | -0.62182700 |
| H | -1.29585000 | -3.10745900 | -1.62106200 |
| H | -0.96358700 | -3.48578400 | 0.07313600  |
| H | -2.49105700 | -3.97358400 | -0.66662300 |
| C | -6.49583700 | -1.02327400 | -1.57118700 |
| H | -5.99134300 | -1.24068400 | -2.51954500 |
| H | -6.62156300 | -1.97614100 | -1.04478000 |
| H | -7.48690300 | -0.62634300 | -1.79670300 |
| O | -4.19004900 | 1.75522500  | 0.81780800  |
| O | -5.88662000 | 3.20744600  | 0.77387100  |
| C | 4.13692000  | -2.63189800 | -0.34324500 |
| H | 5.00712600  | -3.08652300 | -0.81982100 |
| H | 4.08439600  | -2.91598800 | 0.70689100  |
| H | 3.22414000  | -2.95553500 | -0.83765800 |

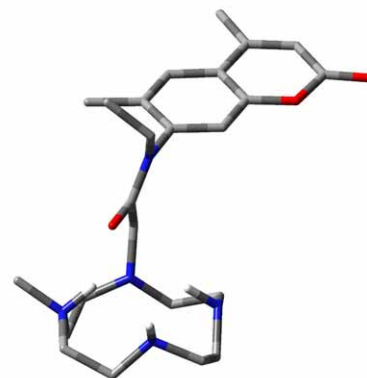



4.[3333].5.iii

|   |             |             |             |
|---|-------------|-------------|-------------|
| C | 5.15608400  | -1.98269000 | -0.35434100 |
| C | 5.99769400  | -0.71773400 | -0.10626100 |
| N | 5.50625200  | 0.06329900  | 1.03012900  |
| C | 5.67805500  | 1.51194100  | 0.93263500  |
| C | 4.79533600  | 2.24050800  | -0.09842600 |
| N | 3.40011900  | 2.24459000  | 0.33335000  |
| C | 2.42790200  | 2.68414900  | -0.65586800 |
| C | 2.16445900  | 1.72110400  | -1.83688700 |
| N | 1.80836600  | 0.37054800  | -1.40675000 |
| C | 2.18571500  | -0.70739800 | -2.32471900 |
| C | 3.63419700  | -1.16200100 | -2.12303600 |
| N | 3.78239900  | -1.77967700 | -0.81203100 |
| H | 1.53654400  | -1.56863700 | -2.13239000 |
| H | 2.03213500  | -0.41425700 | -3.37726800 |
| H | 5.47653100  | 1.94920200  | 1.91812100  |
| H | 6.73213800  | 1.71086900  | 0.70340900  |
| H | 5.11483900  | -2.56052800 | 0.57807300  |
| H | 5.67792800  | -2.60942100 | -1.08917800 |
| H | 2.74226600  | 3.65181700  | -1.06852600 |
| H | 1.48082200  | 2.87746700  | -0.13327800 |
| H | 3.25972600  | -1.22903400 | -0.13242900 |
| H | 3.12461500  | 1.31261100  | 0.63809900  |
| H | 1.39381300  | 2.16675300  | -2.49667000 |
| H | 3.88696800  | -1.89685300 | -2.90160600 |
| H | 7.03628300  | -1.02651700 | 0.08917300  |
| H | 5.13560900  | 3.28299200  | -0.18141300 |
| H | 3.07397500  | 1.63700600  | -2.43902300 |
| H | 4.95564900  | 1.78609600  | -1.09409700 |
| H | 6.02930900  | -0.12548600 | -1.03478700 |
| H | 4.29973200  | -0.29621800 | -2.29119600 |
| C | 0.54310000  | 0.22174400  | -0.72871000 |
| H | 0.04257500  | 1.19343000  | -0.63576700 |
| H | -0.15909000 | -0.41144000 | -1.28954700 |
| C | 0.70280900  | -0.34544800 | 0.70133100  |
| O | 1.79177000  | -0.38556900 | 1.27348400  |
| N | -0.43247700 | -0.80969200 | 1.32026700  |
| C | -0.31616600 | -1.32973000 | 2.69940800  |
| H | -1.11396100 | -2.06555900 | 2.83714600  |
| H | 0.64423500  | -1.84418000 | 2.76732600  |
| C | -0.40583800 | -0.23522400 | 3.76271300  |
| H | 0.40615100  | 0.48509200  | 3.63584700  |
| H | -1.36175500 | 0.29518500  | 3.71109000  |
| H | -0.31867300 | -0.67582100 | 4.76121100  |
| C | -1.74285700 | -0.72497900 | 0.74313200  |
| C | -2.44547300 | 0.47554200  | 0.81794600  |
| C | -2.32302600 | -1.86794800 | 0.14085800  |
| C | -3.73322500 | 0.56397100  | 0.28784300  |
| H | -2.00513800 | 1.34821100  | 1.28654500  |
| C | -3.61088900 | -1.74846100 | -0.37432600 |
| C | -4.34423200 | -0.54851700 | -0.31720800 |
| H | -4.06319700 | -2.61636100 | -0.84305500 |
| C | -5.65044500 | 1.97829000  | -0.09884700 |
| C | -5.69133000 | -0.38421100 | -0.84677800 |
| C | -6.28689700 | 0.82868700  | -0.72815700 |
| H | -7.28782000 | 1.01121800  | -1.10228400 |
| C | -1.56711800 | -3.17050300 | 0.04501200  |
| H | -0.58325200 | -3.03379400 | -0.41487500 |
| H | -1.39202700 | -3.61369700 | 1.03152800  |
| H | -2.12320600 | -3.89779600 | -0.55136100 |
| C | -6.39325000 | -1.53981600 | -1.50532100 |
| H | -5.82498500 | -1.90615100 | -2.36770100 |
| H | -6.50377800 | -2.38049300 | -0.81105000 |
| H | -7.38720500 | -1.24830700 | -1.84964400 |
| O | -4.35846100 | 1.76980100  | 0.39157000  |
| O | -6.13316700 | 3.07684500  | 0.03332000  |
| H | 4.54086400  | -0.16713400 | 1.24587900  |

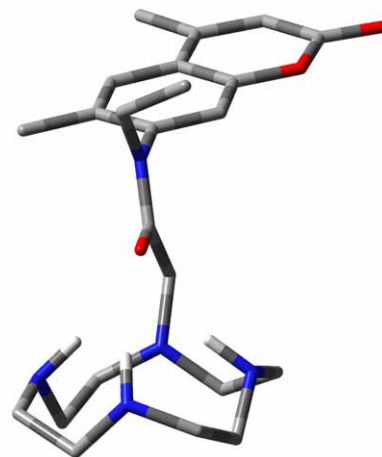

4.[3333].6.iei

|   |             |             |             |
|---|-------------|-------------|-------------|
| C | 4.15941300  | -2.08473500 | -1.97668600 |
| C | 4.46656800  | -2.82744800 | -0.66091100 |
| N | 3.29507200  | -2.84561900 | 0.21253700  |
| C | 3.55884000  | -2.94720200 | 1.64967200  |
| C | 3.84265400  | -1.56731100 | 2.25281400  |
| N | 2.66470500  | -0.72303100 | 2.12361500  |
| C | 2.85302300  | 0.68648500  | 2.41859900  |
| C | 3.70216900  | 1.50288000  | 1.41724600  |
| N | 3.16056900  | 1.50480200  | 0.06173300  |
| C | 4.14063200  | 1.57933000  | -1.02291700 |
| C | 4.75802900  | 0.21525900  | -1.34442000 |
| N | 3.73514200  | -0.69644200 | -1.83697000 |
| H | 3.62794900  | 1.92991300  | -1.92409800 |
| H | 4.94566000  | 2.30170300  | -0.79936100 |
| H | 2.65960000  | -3.34676800 | 2.13038800  |
| H | 4.39315700  | -3.63037800 | 1.88822200  |
| H | 3.36403800  | -2.62678900 | -2.50653700 |
| H | 5.04553000  | -2.12544400 | -2.62528300 |
| H | 3.31337100  | 0.78877700  | 3.41115400  |
| H | 1.86014900  | 1.15006200  | 2.50131400  |
| H | 2.93473600  | -0.65769100 | -1.20510600 |
| H | 2.28207100  | -0.82313700 | 1.18411000  |
| H | 3.81700200  | 2.53355200  | 1.81118500  |
| H | 5.52444000  | 0.35387000  | -2.12119100 |
| H | 4.85192800  | -3.83825000 | -0.89048500 |
| H | 4.09002000  | -1.68810500 | 3.31755500  |
| H | 4.70859800  | 1.07696100  | 1.37074900  |
| H | 4.75155400  | -1.15416500 | 1.77338800  |
| H | 5.27434100  | -2.31112500 | -0.13152800 |
| H | 5.29539600  | -0.14671500 | -0.44784900 |
| H | 2.64451900  | -3.56493200 | -0.08377400 |
| C | 1.92608700  | 2.22905900  | -0.11133400 |
| H | 1.75278900  | 2.92507600  | 0.72324000  |
| H | 1.97374800  | 2.85277400  | -1.01436900 |
| C | 0.69765000  | 1.29828300  | -0.25885200 |
| O | 0.81445400  | 0.08257200  | -0.35805800 |
| N | -0.54449500 | 1.89744300  | -0.30012400 |
| C | -0.77867100 | 3.35224800  | -0.25249900 |
| H | 0.09650000  | 3.86127100  | -0.66233700 |
| H | -1.60616300 | 3.56763800  | -0.93682300 |
| C | -1.10094100 | 3.90726800  | 1.13795600  |
| H | -2.02762300 | 3.48185600  | 1.53115500  |
| H | -0.29759800 | 3.69200200  | 1.84913700  |
| H | -1.22685500 | 4.99376100  | 1.08473700  |
| C | -1.69769600 | 1.04872400  | -0.45294600 |
| C | -2.48161300 | 0.76700100  | 0.66042800  |
| C | -2.04037700 | 0.54461500  | -1.72926200 |
| C | -3.63405600 | -0.00706500 | 0.52129600  |
| H | -2.20175000 | 1.12139300  | 1.64487300  |
| C | -3.19210100 | -0.22832300 | -1.83470400 |
| C | -4.01452900 | -0.52059500 | -0.72987500 |
| H | -3.46306600 | -0.62295300 | -2.80864900 |
| C | -5.53076900 | -0.99497400 | 1.63989700  |
| C | -5.22634300 | -1.32435900 | -0.79668800 |
| C | -5.92690500 | -1.53401400 | 0.34627900  |
| H | -6.83578000 | -2.12478100 | 0.35759800  |
| C | -1.16978100 | 0.80886000  | -2.93138700 |
| H | -0.99550200 | 1.87995200  | -3.08114000 |
| H | -0.19216200 | 0.33204500  | -2.80653300 |
| H | -1.63062200 | 0.41373600  | -3.84014000 |
| C | -5.67925200 | -1.90543100 | -2.10805200 |
| H | -5.86501500 | -1.11635700 | -2.84553400 |
| H | -4.91410700 | -2.56663900 | -2.53013400 |
| H | -6.59850700 | -2.48109300 | -1.98412400 |
| O | -4.36026700 | -0.23587200 | 1.65310700  |
| O | -6.11937200 | -1.14450400 | 2.68479300  |

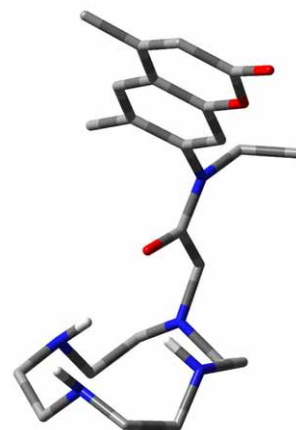

4.[3333].7.iii

|   |             |             |             |
|---|-------------|-------------|-------------|
| C | 5.20798300  | -1.87473300 | -0.35575800 |
| C | 6.03677600  | -0.61587600 | -0.04098500 |
| N | 5.52036600  | 0.11487800  | 1.11767100  |
| C | 5.67381500  | 1.56814500  | 1.07886100  |
| C | 4.79787400  | 2.32449600  | 0.06223800  |
| N | 3.39602100  | 2.29594700  | 0.47136600  |
| C | 2.43513200  | 2.76706400  | -0.51453900 |
| C | 2.20425100  | 1.85400300  | -1.74086800 |
| N | 1.85240200  | 0.48326700  | -1.37528800 |
| C | 2.26040100  | -0.55137200 | -2.32908500 |
| C | 3.71036900  | -0.99720100 | -2.11822700 |
| N | 3.84143800  | -1.66256700 | -0.82927400 |
| H | 1.62022700  | -1.42805200 | -2.18247800 |
| H | 2.12234000  | -0.21817700 | -3.37190100 |
| H | 5.45086600  | 1.96408600  | 2.07709700  |
| H | 6.72855200  | 1.78949400  | 0.87467500  |
| H | 5.15474400  | -2.49068000 | 0.55133200  |
| H | 5.74725600  | -2.46750500 | -1.10604800 |
| H | 2.74412400  | 3.75593700  | -0.87805400 |
| H | 1.47672400  | 2.92478500  | -0.00066600 |
| H | 3.30006000  | -1.14411200 | -0.13899200 |
| H | 3.12600800  | 1.34924500  | 0.73236900  |
| H | 1.44211100  | 2.32072200  | -2.39590600 |
| H | 3.98506100  | -1.69925200 | -2.91932500 |
| H | 7.07386500  | -0.92643600 | 0.15959300  |
| H | 5.12596300  | 3.37340500  | 0.02398300  |
| H | 3.12569500  | 1.80401100  | -2.32849600 |
| H | 4.97906300  | 1.90957400  | -0.94696300 |
| H | 6.08034900  | 0.01432400  | -0.94355000 |
| H | 4.36907100  | -0.11882000 | -2.24201600 |
| C | 0.57259400  | 0.29763400  | -0.73493300 |
| H | 0.05460000  | 1.25891400  | -0.62174300 |
| H | -0.10505400 | -0.32229100 | -1.33589100 |
| C | 0.69770500  | -0.29875800 | 0.68639200  |
| O | 1.77971500  | -0.39058200 | 1.26440500  |
| N | -0.46865600 | -0.66348200 | 1.31857600  |
| C | -0.39809000 | -0.99756900 | 2.75958300  |
| H | 0.41734900  | -0.40703600 | 3.18159100  |
| H | -1.33650500 | -0.66764500 | 3.21400900  |
| C | -0.15885800 | -2.48113100 | 3.03864800  |
| H | -0.98157500 | -3.10067200 | 2.66863700  |
| H | 0.77321700  | -2.80992700 | 2.57224400  |
| H | -0.07639900 | -2.64596300 | 4.11799600  |
| C | -1.76101900 | -0.60477300 | 0.69563500  |
| C | -2.58805100 | 0.47755000  | 0.99739300  |
| C | -2.21112000 | -1.63902100 | -0.16094100 |
| C | -3.86743300 | 0.55689000  | 0.45173500  |
| H | -2.24517600 | 1.26836100  | 1.65545100  |
| C | -3.49428000 | -1.52562500 | -0.69478700 |
| C | -4.34748400 | -0.44517600 | -0.41125900 |
| H | -3.84944200 | -2.31329400 | -1.35146300 |
| C | -5.91080800 | 1.83210800  | 0.30047400  |
| C | -5.69394900 | -0.29835100 | -0.94740000 |
| C | -6.41304800 | 0.79521700  | -0.59159800 |
| H | -7.41966500 | 0.95964100  | -0.95870800 |
| C | -1.34677300 | -2.82453900 | -0.51789700 |
| H | -0.63449800 | -2.58171100 | -1.31599900 |
| H | -0.76000100 | -3.17416700 | 0.33325800  |
| H | -1.96181800 | -3.65392600 | -0.87621500 |
| C | -6.25975400 | -1.34022500 | -1.87260200 |
| H | -5.64284300 | -1.44461600 | -2.77225200 |
| H | -6.29127400 | -2.32230800 | -1.38738400 |
| H | -7.27351000 | -1.07918200 | -2.18186400 |
| O | -4.61583800 | 1.64418300  | 0.79025900  |
| O | -6.50684700 | 2.82284700  | 0.64779700  |
| H | 4.55588400  | -0.13713500 | 1.31214700  |

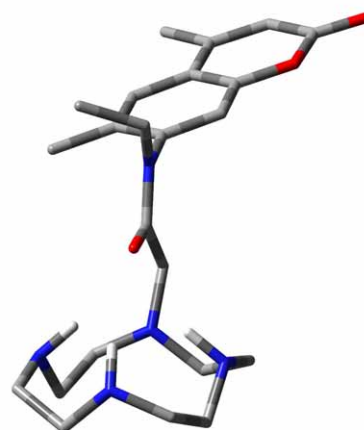

4.[3333].8.eie

|   |             |             |             |
|---|-------------|-------------|-------------|
| C | 1.57365200  | 3.41212000  | -0.48763400 |
| C | 3.02149800  | 3.02170000  | -0.79964600 |
| N | 3.06584700  | 1.79723400  | -1.58719000 |
| C | 4.39607900  | 1.21077600  | -1.72128900 |
| C | 4.89552500  | 0.47053700  | -0.46711200 |
| N | 4.00792000  | -0.64630900 | -0.15561700 |
| C | 3.97243300  | -1.08813800 | 1.23477000  |
| C | 2.97924400  | -0.28881200 | 2.09148200  |
| N | 1.58705500  | -0.28553000 | 1.62854300  |
| C | 0.82241900  | 0.82629500  | 2.21077800  |
| C | 1.17523400  | 2.21170400  | 1.64149000  |
| N | 0.85203700  | 2.35071700  | 0.22408000  |
| H | -0.23969100 | 0.64482300  | 2.01832600  |
| H | 0.93653200  | 0.87349800  | 3.31208400  |
| H | 4.38115500  | 0.50004400  | -2.56021500 |
| H | 5.11029500  | 1.99765300  | -1.99699900 |
| H | 1.04854900  | 3.57529500  | -1.43412700 |
| H | 1.57534600  | 4.37325500  | 0.05809300  |
| H | 4.95620000  | -1.01183800 | 1.73442500  |
| H | 3.68832100  | -2.14056000 | 1.24154900  |
| H | 3.04951700  | -0.66929100 | 3.13149400  |
| H | 0.66611800  | 2.96384900  | 2.27179400  |
| H | 3.47979200  | 3.83942100  | -1.37347800 |
| H | 5.95059900  | 0.16599300  | -0.60142000 |
| H | 3.31605900  | 0.75073200  | 2.12597200  |
| H | 4.88530800  | 1.16053900  | 0.38461000  |
| H | 3.59397200  | 2.96636700  | 0.14771800  |
| H | 2.24473800  | 2.40032400  | 1.76961700  |
| C | 0.92420000  | -1.59070600 | 1.76032900  |
| H | 1.38017800  | -2.20183200 | 2.55503000  |
| H | -0.12354800 | -1.43870800 | 2.02970400  |
| C | 1.01850400  | -2.44004300 | 0.47855200  |
| O | 1.99460900  | -3.15150300 | 0.25420500  |
| N | -0.03459100 | -2.41287000 | -0.41584500 |
| C | 0.15853000  | -3.12247800 | -1.69879000 |
| H | 0.71208400  | -4.03779900 | -1.48251700 |
| H | -0.82868800 | -3.39452600 | -2.08120100 |
| C | 0.91193200  | -2.27080000 | -2.72161700 |
| H | 0.35324100  | -1.36448200 | -2.97438900 |
| H | 1.88561700  | -1.97496500 | -2.32400100 |
| H | 1.07022900  | -2.84085600 | -3.64329000 |
| C | -1.23555600 | -1.65220400 | -0.26275700 |
| C | -1.19863200 | -0.26730900 | -0.40656900 |
| C | -2.45911900 | -2.32375900 | -0.00531400 |
| C | -2.37884400 | 0.46621100  | -0.28538400 |
| H | -0.25915900 | 0.25059100  | -0.57454400 |
| C | -3.61843200 | -1.55942900 | 0.08481200  |
| C | -3.61562100 | -0.15856800 | -0.05347400 |
| H | -4.55802900 | -2.06476400 | 0.28371400  |
| C | -3.37477800 | 2.67498200  | -0.29122700 |
| C | -4.80178400 | 0.67976600  | 0.04217400  |
| C | -4.65879100 | 2.02398400  | -0.08254700 |
| H | -5.50682500 | 2.69602300  | -0.01817800 |
| C | -2.51209500 | -3.81971500 | 0.18835600  |
| H | -2.41953600 | -4.36021200 | -0.76088600 |
| H | -1.69672400 | -4.16757200 | 0.82894200  |
| H | -3.45992900 | -4.11762800 | 0.64370300  |
| C | -6.15170500 | 0.05876000  | 0.27544600  |
| H | -6.40015500 | -0.65327500 | -0.51945100 |
| H | -6.17220100 | -0.49427400 | 1.22136200  |
| H | -6.93249200 | 0.82090000  | 0.30897900  |
| O | -2.27124100 | 1.82546900  | -0.39935700 |
| O | -3.17528600 | 3.86405400  | -0.37347000 |
| H | 2.46470100  | 1.11167900  | -1.12942000 |
| H | -0.14598300 | 2.50219600  | 0.11088500  |
| H | 4.19851400  | -1.43671000 | -0.76167300 |

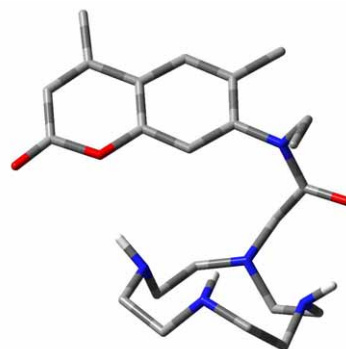

[4.**[3333]**.8.eie.N7-CH<sub>3</sub>]<sup>+</sup>

|   |             |             |             |
|---|-------------|-------------|-------------|
| C | 2.80058700  | 2.33529100  | 1.21495200  |
| C | 3.90369600  | 1.97306100  | 0.20648800  |
| N | 3.26656700  | 1.30070000  | -0.98441900 |
| C | 4.17604600  | 0.30462900  | -1.66376500 |
| C | 4.04000200  | -1.07309000 | -1.01696000 |
| N | 2.64382600  | -1.49471200 | -1.08456100 |
| C | 2.32416900  | -2.73875400 | -0.35741500 |
| C | 2.06657100  | -2.56146300 | 1.14585400  |
| N | 0.94382300  | -1.66990300 | 1.49482900  |
| C | 1.23242000  | -0.83547400 | 2.67030300  |
| C | 2.28892300  | 0.25114200  | 2.45966800  |
| N | 1.92782300  | 1.17834900  | 1.38709400  |
| H | 0.29868000  | -0.33768800 | 2.95854900  |
| H | 1.53981200  | -1.43651300 | 3.54602100  |
| H | 3.87212100  | 0.25562900  | -2.71256200 |
| H | 5.19899900  | 0.68643900  | -1.62787000 |
| H | 2.20548800  | 3.16990300  | 0.83519300  |
| H | 3.28289600  | 2.67025100  | 2.14537600  |
| H | 3.12728500  | -3.48690000 | -0.46543000 |
| H | 1.43804200  | -3.17268600 | -0.81933000 |
| H | 1.91347100  | -3.56819800 | 1.56326400  |
| H | 2.41927000  | 0.76782800  | 3.42594200  |
| H | 4.46585800  | 2.84350000  | -0.13949400 |
| H | 4.74811600  | -1.75580500 | -1.51596500 |
| H | 2.97512700  | -2.17409000 | 1.61789800  |
| H | 4.34598100  | -1.02896200 | 0.03436900  |
| H | 4.60420300  | 1.25536100  | 0.63938600  |
| H | 3.26267300  | -0.19634300 | 2.22583100  |
| C | -0.32927400 | -2.38248000 | 1.70537800  |
| H | -0.23308600 | -3.18108000 | 2.46047500  |
| H | -1.06186900 | -1.66050900 | 2.07228300  |
| C | -0.86613600 | -3.08844900 | 0.45523200  |
| O | -0.44486400 | -4.19851300 | 0.14439100  |
| N | -1.87880300 | -2.48121000 | -0.26604900 |
| C | -2.40734400 | -3.22674500 | -1.43295500 |
| H | -2.42783400 | -4.28089100 | -1.15333100 |
| H | -3.43361600 | -2.89603300 | -1.60061600 |
| C | -1.57392500 | -3.02842800 | -2.69885500 |
| H | -1.51445800 | -1.97124600 | -2.97692900 |
| H | -0.56318100 | -3.41934700 | -2.55756400 |
| H | -2.03069900 | -3.57055100 | -3.53253900 |
| C | -2.21970400 | -1.09842100 | -0.14875000 |
| C | -1.22224300 | -0.14175300 | -0.34525000 |
| C | -3.55176200 | -0.69915400 | 0.13786800  |
| C | -1.53664400 | 1.20882400  | -0.25634100 |
| H | -0.19696500 | -0.44217800 | -0.52505900 |
| C | -3.82965000 | 0.66590800  | 0.18399700  |
| C | -2.84586700 | 1.65325600  | -0.01421100 |
| H | -4.84606700 | 0.97654900  | 0.40249000  |
| C | -0.67765500 | 3.46621000  | -0.34915100 |
| C | -3.08670800 | 3.08808800  | 0.03025200  |
| C | -2.03144000 | 3.93202700  | -0.14119700 |
| H | -2.15203200 | 5.00857100  | -0.11542300 |
| C | -4.64709500 | -1.69940200 | 0.41879800  |
| H | -5.16136200 | -2.01216800 | -0.49757700 |
| H | -4.25219500 | -2.60049600 | 0.89417000  |
| H | -5.40265900 | -1.26588300 | 1.07856600  |
| C | -4.47382600 | 3.61699300  | 0.26107300  |
| H | -5.16272800 | 3.25733500  | -0.51099700 |
| H | -4.86623200 | 3.27911100  | 1.22672200  |
| H | -4.48608500 | 4.70791500  | 0.25048100  |
| O | -0.49622500 | 2.09097400  | -0.41685100 |
| O | 0.32316400  | 4.15359600  | -0.46094900 |
| H | 2.48412700  | 0.74885900  | -0.55058200 |
| H | 0.95922400  | 1.46580800  | 1.46404600  |
| H | 2.40057000  | -1.63862600 | -2.06222200 |
| C | 2.67718200  | 2.28802600  | -1.94751100 |
| H | 3.49016400  | 2.83756200  | -2.42540000 |
| H | 2.11047800  | 1.73626200  | -2.69814200 |
| H | 2.00730700  | 2.96923500  | -1.42001900 |

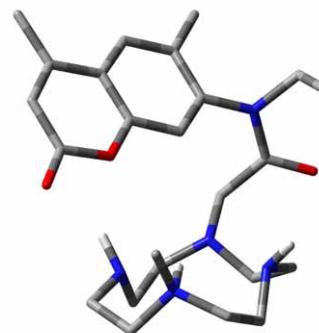

4.[3333].9.eie

|   |             |             |             |
|---|-------------|-------------|-------------|
| C | -1.90443300 | -3.51229700 | 0.20757600  |
| C | -3.35908600 | -3.23659100 | -0.19426700 |
| N | -3.38864000 | -2.23847300 | -1.25750700 |
| C | -4.66486000 | -1.54582400 | -1.41986100 |
| C | -4.90804600 | -0.43087900 | -0.38684000 |
| N | -3.86174500 | 0.58799200  | -0.48952500 |
| C | -3.73635800 | 1.49262700  | 0.65501200  |
| C | -2.93100300 | 0.88928500  | 1.81734100  |
| N | -1.50528800 | 0.63747000  | 1.55448400  |
| C | -0.97360700 | -0.48136800 | 2.35005300  |
| C | -1.52553900 | -1.86958300 | 2.00515800  |
| N | -1.23778600 | -2.28171300 | 0.63916200  |
| H | 0.11129300  | -0.50470400 | 2.19457800  |
| H | -1.12660700 | -0.32615100 | 3.43646100  |
| H | -4.69885000 | -1.10308600 | -2.42612100 |
| H | -5.48482900 | -2.27347200 | -1.37847200 |
| H | -1.37235600 | -3.88459100 | -0.67465400 |
| H | -1.88155500 | -4.31201000 | 0.97024900  |
| H | -4.71988700 | 1.78465500  | 1.06826600  |
| H | -3.25621600 | 2.41424200  | 0.32069500  |
| H | -3.05319700 | 1.55541900  | 2.69204900  |
| H | -1.11992100 | -2.57030600 | 2.76139200  |
| H | -3.81257300 | -4.17405100 | -0.54515600 |
| H | -5.92702400 | -0.01711300 | -0.50483300 |
| H | -3.39814500 | -0.05884500 | 2.09422500  |
| H | -4.86803000 | -0.86048200 | 0.62056600  |
| H | -3.93109000 | -2.94163200 | 0.70638900  |
| H | -2.61056300 | -1.89124800 | 2.14507900  |
| C | -0.68534700 | 1.84253900  | 1.73595900  |
| H | -1.05400500 | 2.47605300  | 2.55841100  |
| H | 0.33153900  | 1.53556100  | 1.98855800  |
| C | -0.63247600 | 2.76722600  | 0.51120900  |
| O | -1.31082000 | 3.79136800  | 0.46281100  |
| N | 0.20296100  | 2.42404900  | -0.52996000 |
| C | 0.25074800  | 3.33402500  | -1.69277600 |
| H | 0.53728000  | 2.73942600  | -2.56447700 |
| H | -0.76133800 | 3.71286100  | -1.84893500 |
| C | 1.22255800  | 4.49833200  | -1.49709100 |
| H | 0.91742200  | 5.10506400  | -0.64113400 |
| H | 2.24439600  | 4.14180600  | -1.33327600 |
| H | 1.22713000  | 5.13768400  | -2.38623300 |
| C | 1.07985500  | 1.29059800  | -0.54213600 |
| C | 2.29172900  | 1.35755500  | 0.14448000  |
| C | 0.73733000  | 0.14263800  | -1.29733700 |
| C | 3.17783200  | 0.28085400  | 0.10472200  |
| H | 2.56063900  | 2.24235100  | 0.71045000  |
| C | 1.64964100  | -0.90966800 | -1.32647600 |
| C | 2.87773200  | -0.87469800 | -0.63785700 |
| H | 1.39774600  | -1.79190100 | -1.90636500 |
| C | 5.30908900  | -0.59179100 | 0.82882600  |
| C | 3.85706200  | -1.95212200 | -0.64805600 |
| C | 5.00408000  | -1.78977300 | 0.05845400  |
| H | 5.76944900  | -2.55696000 | 0.08673700  |
| C | -0.57571500 | 0.05781900  | -2.02856300 |
| H | -1.40553600 | 0.28903400  | -1.35375100 |
| H | -0.61726500 | 0.76321400  | -2.86715700 |
| H | -0.73455100 | -0.94524600 | -2.43090400 |
| C | 3.59282500  | -3.20898200 | -1.43118000 |
| H | 2.67937200  | -3.70575200 | -1.08496100 |
| H | 3.45313500  | -2.98691100 | -2.49504000 |
| H | 4.42186500  | -3.91255400 | -1.33423100 |
| O | 4.34121100  | 0.41336700  | 0.80561700  |
| O | 6.31067900  | -0.39677400 | 1.47589100  |
| H | -4.00940600 | 1.13226400  | -1.33451100 |
| H | -0.23468500 | -2.34699700 | 0.49923100  |
| H | -2.69276900 | -1.53411500 | -1.01234600 |

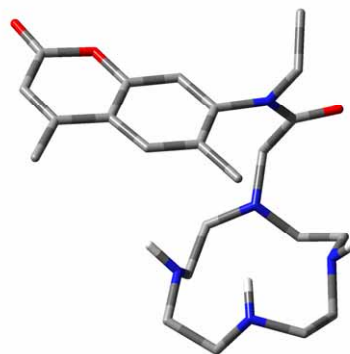

[4.[3333].9.eie.N7-CH<sub>3</sub>]<sup>+</sup>

|   |             |             |             |
|---|-------------|-------------|-------------|
| C | 5.63549500  | -0.81876700 | -0.84010800 |
| C | 5.27042100  | 0.53849300  | -0.23219200 |
| N | 4.20097800  | 0.47277400  | 0.82829100  |
| C | 3.97786200  | 1.82899800  | 1.46092300  |
| C | 3.44457000  | 2.92555000  | 0.52979800  |
| N | 2.03511400  | 2.73702600  | 0.19693000  |
| C | 1.65533700  | 2.76629600  | -1.21577900 |
| C | 2.03941800  | 1.49620300  | -2.00013100 |
| N | 1.92177600  | 0.23483700  | -1.24858900 |
| C | 2.22588300  | -0.92836800 | -2.10684500 |
| C | 3.71428500  | -1.15046900 | -2.39805200 |
| N | 4.45448600  | -1.58139400 | -1.20446500 |
| H | 1.86426800  | -1.82282600 | -1.59173400 |
| H | 1.67717100  | -0.85839400 | -3.06318700 |
| H | 3.25650000  | 1.67110500  | 2.26462100  |
| H | 4.93500900  | 2.12616700  | 1.90164000  |
| H | 6.21254400  | -1.40582000 | -0.12009400 |
| H | 6.31960800  | -0.60207500 | -1.67994500 |
| H | 2.07398600  | 3.62568900  | -1.76642100 |
| H | 0.56926100  | 2.89604800  | -1.24367500 |
| H | 1.43102800  | 1.48503700  | -2.92264800 |
| H | 3.78464600  | -1.90654200 | -3.19045300 |
| H | 6.15428100  | 1.00271400  | 0.21584000  |
| H | 3.60365600  | 3.86937900  | 1.06831200  |
| H | 3.07871600  | 1.57851800  | -2.33739600 |
| H | 4.05192800  | 3.00932400  | -0.37803200 |
| H | 4.89612200  | 1.20652900  | -1.00685300 |
| H | 4.16986200  | -0.24599800 | -2.81912100 |
| C | 0.60745300  | 0.06153200  | -0.62357700 |
| H | 0.25302700  | 1.02395300  | -0.25456200 |
| H | -0.14890400 | -0.30846600 | -1.33123600 |
| C | 0.70347200  | -0.85449600 | 0.60445800  |
| O | 1.78220800  | -1.02398500 | 1.18155000  |
| N | -0.44249300 | -1.46034900 | 1.03002700  |
| C | -0.37892500 | -2.32266900 | 2.23226100  |
| H | -1.17950100 | -3.06053100 | 2.13986400  |
| H | 0.57675500  | -2.84868200 | 2.19815400  |
| C | -0.51702100 | -1.54488400 | 3.54049700  |
| H | 0.29650600  | -0.82234600 | 3.64635000  |
| H | -1.47084100 | -1.01180900 | 3.59039400  |
| H | -0.47341300 | -2.23426600 | 4.38920200  |
| C | -1.74320600 | -1.12157200 | 0.51527800  |
| C | -2.29635300 | 0.11137100  | 0.85609200  |
| C | -2.45474600 | -2.03846300 | -0.29202100 |
| C | -3.56188600 | 0.46301900  | 0.38744700  |
| H | -1.76117200 | 0.80731100  | 1.49223200  |
| C | -3.72352000 | -1.66192600 | -0.73177600 |
| C | -4.30696500 | -0.42320200 | -0.41125100 |
| H | -4.27940200 | -2.35521700 | -1.35441800 |
| C | -5.28563900 | 2.15247900  | 0.33373200  |
| C | -5.63044400 | 0.00256600  | -0.85437700 |
| C | -6.06743100 | 1.23081700  | -0.48093300 |
| H | -7.04143100 | 1.60297900  | -0.77739100 |
| C | -1.87448300 | -3.37779500 | -0.67670600 |
| H | -0.81998700 | -3.29638200 | -0.95633000 |
| H | -1.93041900 | -4.09866000 | 0.14747600  |
| H | -2.41927300 | -3.80755100 | -1.52037700 |
| C | -6.47691000 | -0.90913200 | -1.69836400 |
| H | -5.96929300 | -1.16476900 | -2.63534500 |
| H | -6.68404900 | -1.84947600 | -1.17522500 |
| H | -7.43059200 | -0.43963200 | -1.94491500 |
| O | -4.02558300 | 1.68971700  | 0.74380900  |
| O | -5.61294700 | 3.25892800  | 0.68021200  |
| H | 1.46725400  | 3.40229100  | 0.70856800  |
| H | 4.68160100  | -2.56669300 | -1.26085900 |
| H | 3.30111400  | 0.16007800  | 0.37528500  |
| C | 4.52130100  | -0.53546700 | 1.88979000  |
| H | 5.49942900  | -0.30584600 | 2.31749600  |
| H | 3.74405000  | -0.49015600 | 2.64841400  |
| H | 4.50369300  | -1.52321200 | 1.43746000  |

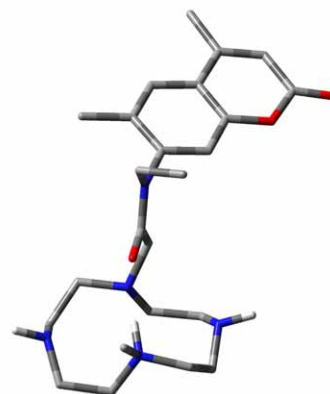

Reference

1 Gaussian 03, Revision C.02, M. J. Frisch *et al.*, Gaussian, Inc., Wallingford CT, 2004.
